# Supplementary material for: Small RNA Sequencing Reveals Dlk1-Dio3 Locus-Embedded MicroRNAs as Major Drivers of Ground-State Pluripotency
Source: PubMed Central journal article supplement (PMC5785679; doi:10.1016/j.stemcr.2017.10.009), 2017-11-09
Supplement: mmc1.pdf [file mmc1.pdf]

**Stem Cell Reports, Volume 9**

**Supplemental Information**

**Small RNA Sequencing Reveals *Dlk1-Dio3* Locus-Embedded  
MicroRNAs as Major Drivers of Ground-State Pluripotency**

**Sharif Moradi, Ali Sharifi-Zarchi, Amirhossein Ahmadi, Sepideh  
Mollamohammadi, Alexander Stubenvoll, Stefan Günther, Ghasem Hosseini  
Salekdeh, Sassan Asgari, Thomas Braun, and Hossein Baharvand**

## **Supplemental Information**

### **Small RNA Sequencing Reveals *Dlk1-Dio3* Locus-Embedded MicroRNAs as Major Drivers of Ground State Pluripotency**

Sharif Moradi, Ali Sharifi-Zarchi, Amirhossein Ahmadi, Sepideh Mollamohammadi, Alexander Stubenvoll, Stefan Günther, Ghasem Hosseini Salekdeh, Sassan Asgari, Thomas Braun, Hossein Baharvand

#### **INVENTORY OF SUPPLEMENTARY INFORMATION**

##### **I. Supplementary Data**

Figure S1, related to Figures 1 and 3

Figure S2, related to Figure 3

Figure S3, related to Figure 3

Figure S4, related to Figures 4 and 5

Figure S5, related to Figure 4

Figure S6, related to Figures 5, 6, and 7

Table S1, related to Figure 3

Table S2, related to Figure 3

Table S3, related to Figure 3

Table S4, related to Figure 3

Table S5, related to Figure 3

Table S6, related to Figure 3

Table S7, related to Figures 3 and 5

Table S8, related to Figure 5

## **II. Supplemental Experimental Procedure**

## **III. Supplemental References**

# I. Supplemental Data

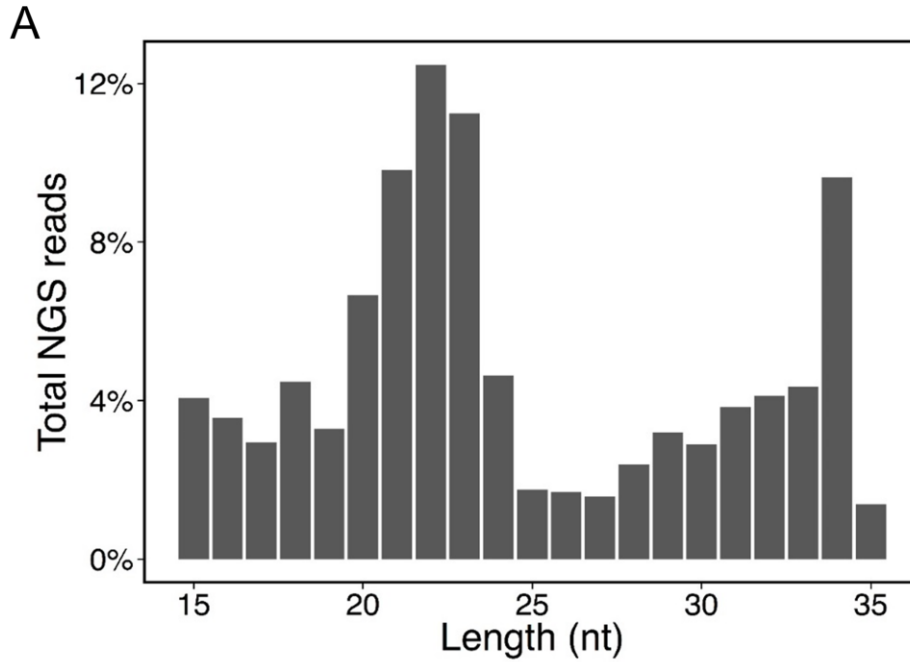

**B Top 20: with miR-290 cluster**

| Serum           | 2i              | R2i             |
|-----------------|-----------------|-----------------|
| mmu-miR-295-3p  | mmu-miR-295-3p  | mmu-miR-295-3p  |
| mmu-miR-92a-3p  | mmu-miR-182-5p  | mmu-miR-182-5p  |
| mmu-miR-182-5p  | mmu-miR-183-5p  | mmu-miR-92a-3p  |
| mmu-miR-183-5p  | mmu-miR-92a-3p  | mmu-miR-183-5p  |
| mmu-miR-292a-5p | mmu-miR-16-5p   | mmu-miR-16-5p   |
| mmu-miR-292a-3p | mmu-miR-26a-5p  | mmu-miR-292a-3p |
| mmu-miR-291a-5p | mmu-miR-291a-5p | mmu-miR-292a-5p |
| mmu-miR-294-3p  | mmu-miR-292a-3p | mmu-miR-291a-5p |
| mmu-miR-16-5p   | mmu-miR-293-3p  | mmu-miR-26a-5p  |
| mmu-miR-26a-5p  | mmu-miR-27b-3p  | mmu-miR-293-3p  |
| mmu-miR-293-3p  | mmu-miR-292a-5p | mmu-miR-294-3p  |
| mmu-miR-30e-5p  | mmu-miR-294-3p  | mmu-miR-30e-5p  |
| mmu-miR-191-5p  | mmu-miR-93-5p   | mmu-miR-191-5p  |
| mmu-miR-22-3p   | mmu-miR-191-5p  | mmu-miR-27b-3p  |
| mmu-miR-21a-5p  | mmu-miR-127-3p  | mmu-miR-127-3p  |
| mmu-miR-27b-3p  | mmu-miR-30e-5p  | mmu-miR-93-5p   |
| mmu-miR-93-5p   | mmu-miR-291a-3p | mmu-miR-291a-3p |
| mmu-miR-181c-5p | mmu-miR-148a-3p | mmu-miR-148a-3p |
| mmu-miR-291a-3p | mmu-miR-186-5p  | mmu-miR-293-5p  |
| mmu-miR-293-5p  | mmu-miR-293-5p  | mmu-miR-25-3p   |

**C Top 20: without miR-290 cluster**

| Serum           | 2i              | R2i             |
|-----------------|-----------------|-----------------|
| mmu-miR-92a-3p  | mmu-miR-182-5p  | mmu-miR-182-5p  |
| mmu-miR-182-5p  | mmu-miR-183-5p  | mmu-miR-92a-3p  |
| mmu-miR-183-5p  | mmu-miR-92a-3p  | mmu-miR-183-5p  |
| mmu-miR-16-5p   | mmu-miR-16-5p   | mmu-miR-16-5p   |
| mmu-miR-26a-5p  | mmu-miR-26a-5p  | mmu-miR-26a-5p  |
| mmu-miR-30e-5p  | mmu-miR-27b-3p  | mmu-miR-30e-5p  |
| mmu-miR-191-5p  | mmu-miR-93-5p   | mmu-miR-191-5p  |
| mmu-miR-22-3p   | mmu-miR-191-5p  | mmu-miR-27b-3p  |
| mmu-miR-21a-5p  | mmu-miR-127-3p  | mmu-miR-127-3p  |
| mmu-miR-27b-3p  | mmu-miR-30e-5p  | mmu-miR-93-5p   |
| mmu-miR-93-5p   | mmu-miR-148a-3p | mmu-miR-148a-3p |
| mmu-miR-181c-5p | mmu-miR-186-5p  | mmu-miR-25-3p   |
| mmu-miR-148a-3p | mmu-miR-181c-5p | mmu-miR-541-5p  |
| mmu-miR-25-3p   | mmu-miR-25-3p   | mmu-miR-302d-3p |
| mmu-miR-5099    | mmu-miR-541-5p  | mmu-miR-186-5p  |
| mmu-miR-186-5p  | mmu-miR-30d-5p  | mmu-miR-130a-3p |
| mmu-miR-130a-3p | mmu-miR-22-3p   | mmu-miR-5099    |
| mmu-miR-7a-5p   | mmu-miR-298-5p  | mmu-miR-22-3p   |
| mmu-miR-30a-5p  | mmu-miR-130a-3p | mmu-miR-30d-5p  |
| mmu-miR-26b-5p  | mmu-miR-30c-5p  | mmu-miR-30a-5p  |

**Figure S1: Assessment of miRNA expression in serum, 2i, and R2i cultures, related to Figures 1 and 3**

(A) Size distribution of small RNA sequences identified by small RNA sequencing

(B) Top 20 abundantly expressed miRNAs in three ESC culture conditions.

(C) Top 20 abundantly expressed miRNAs in three ESC culture conditions excluding the miR-290~295 cluster.

Small RNA sequencing data were obtained for two ESC lines (RB18 and EB20) each time using pools of three independently grown cultures.

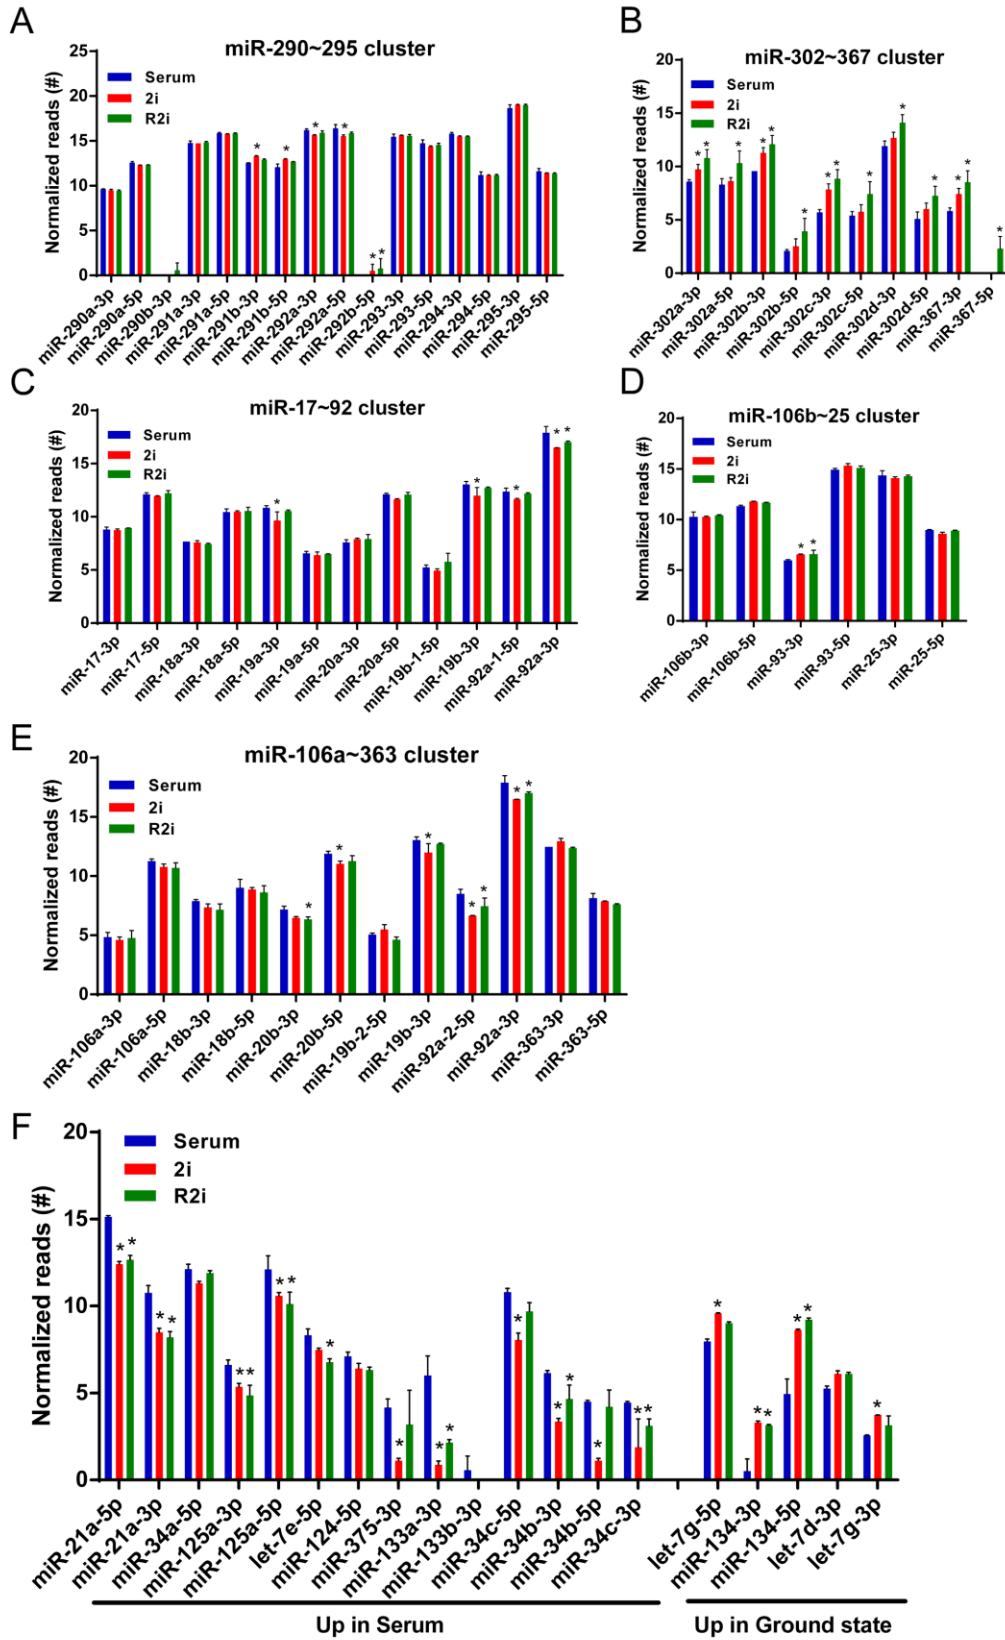

**Figure S2: Expression status of miRNAs associated with pluripotency and differentiation, related to Figure 3**

(A) Bar plot depicting the expression pattern of members of the miR-290~295 cluster.

(B) Bar plot depicting the expression pattern of the miR-302~367 cluster.

(C-E) Bar plots depicting the expression patterns of the miR-17~92 cluster (E), miR-106b~25 cluster (F), and miR-106a-363 cluster (G).

(F) Bar plot depicting the expression pattern of miRNAs associated with differentiation.

We used two different ESC lines (RB18 and RB20). Each cell line was a pool of three independently grown cultures. Data are shown as mean  $\pm$  SD. \* $p < 0.05$ .

### GO Biological Process – Ground State

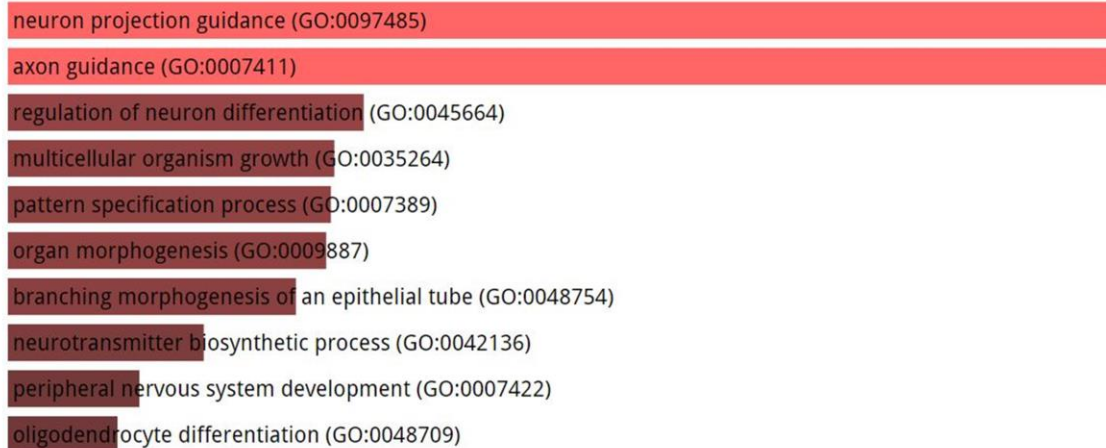

### GO Biological Process – Serum

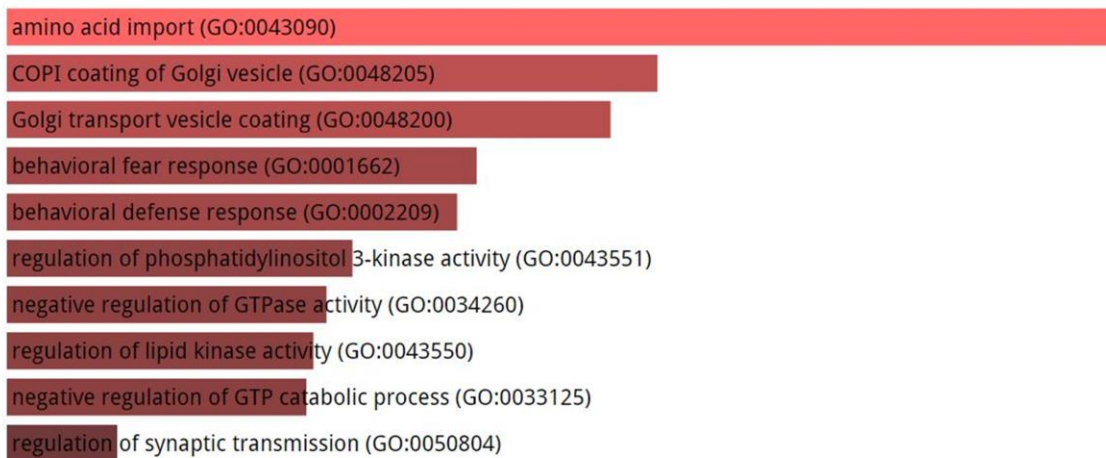

**Figure S3: GO analysis of predicted targets of miRNAs associated with serum or ground state using Enrichr, related to Figure 3**



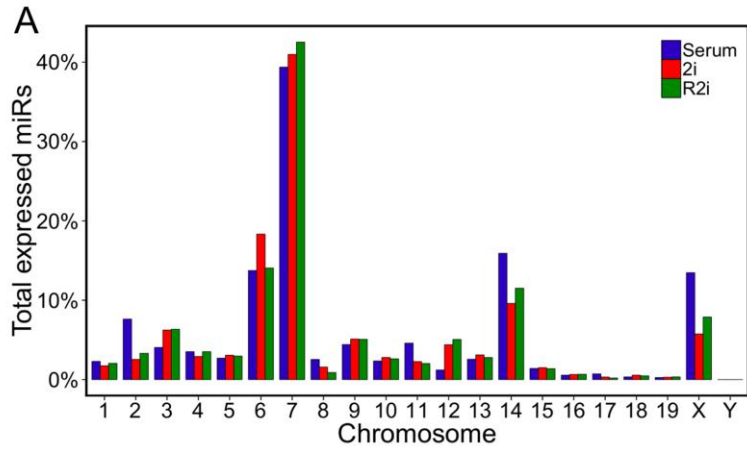

**B**

| Ground state up miRNAs |                 |                 |                 |
|------------------------|-----------------|-----------------|-----------------|
| mmu-let-7g-5p          | mmu-miR-301a-3p | mmu-miR-376b-5p | mmu-miR-485-5p  |
| mmu-miR-1193-3p        | mmu-miR-301a-5p | mmu-miR-376c-3p | mmu-miR-487b-3p |
| mmu-miR-1197-3p        | mmu-miR-301b-3p | mmu-miR-377-3p  | mmu-miR-494-3p  |
| mmu-miR-1247-3p        | mmu-miR-301b-5p | mmu-miR-379-3p  | mmu-miR-495-3p  |
| mmu-miR-127-3p         | mmu-miR-302a-3p | mmu-miR-379-5p  | mmu-miR-496a-3p |
| mmu-miR-127-5p         | mmu-miR-302b-3p | mmu-miR-380-3p  | mmu-miR-499-5p  |
| mmu-miR-134-5p         | mmu-miR-302c-3p | mmu-miR-381-3p  | mmu-miR-505-3p  |
| mmu-miR-136-3p         | mmu-miR-3072-3p | mmu-miR-382-3p  | mmu-miR-539-5p  |
| mmu-miR-136-5p         | mmu-miR-323-3p  | mmu-miR-382-5p  | mmu-miR-540-3p  |
| mmu-miR-147-3p         | mmu-miR-324-3p  | mmu-miR-409-3p  | mmu-miR-540-5p  |
| mmu-miR-147-5p         | mmu-miR-324-5p  | mmu-miR-409-5p  | mmu-miR-541-3p  |
| mmu-miR-154-3p         | mmu-miR-329-3p  | mmu-miR-410-3p  | mmu-miR-541-5p  |
| mmu-miR-154-5p         | mmu-miR-329-5p  | mmu-miR-411-3p  | mmu-miR-543-3p  |
| mmu-miR-15a-3p         | mmu-miR-337-3p  | mmu-miR-411-5p  | mmu-miR-665-3p  |
| mmu-miR-15a-5p         | mmu-miR-337-5p  | mmu-miR-412-3p  | mmu-miR-666-3p  |
| mmu-miR-16-1-3p        | mmu-miR-341-3p  | mmu-miR-412-5p  | mmu-miR-666-5p  |
| mmu-miR-184-3p         | mmu-miR-341-5p  | mmu-miR-431-3p  | mmu-miR-667-3p  |
| mmu-miR-187-3p         | mmu-miR-367-3p  | mmu-miR-431-5p  | mmu-miR-668-3p  |
| mmu-miR-1981-5p        | mmu-miR-369-3p  | mmu-miR-433-3p  | mmu-miR-673-3p  |
| mmu-miR-199a-3p        | mmu-miR-369-5p  | mmu-miR-433-5p  | mmu-miR-673-5p  |
| mmu-miR-218-5p         | mmu-miR-370-3p  | mmu-miR-434-3p  | mmu-miR-679-5p  |
| mmu-miR-299a-3p        | mmu-miR-370-5p  | mmu-miR-434-5p  | mmu-miR-743b-3p |
| mmu-miR-299a-5p        | mmu-miR-376a-3p | mmu-miR-451a    | mmu-miR-758-3p  |
| mmu-miR-300-3p         | mmu-miR-376a-5p | mmu-miR-470-5p  | mmu-miR-871-3p  |
| mmu-miR-300-5p         | mmu-miR-376b-3p | mmu-miR-485-3p  | mmu-miR-874-3p  |
| mmu-miR-98-5p          |                 |                 |                 |

72 out of 101 ground state up miRNAs are embedded in Dlk-1-Dio3 locus

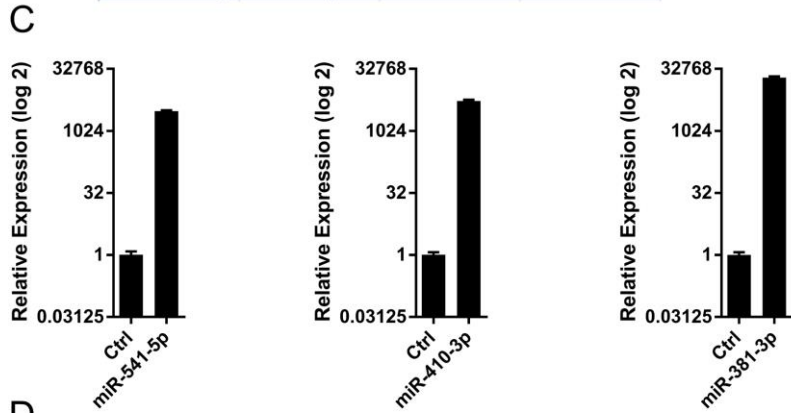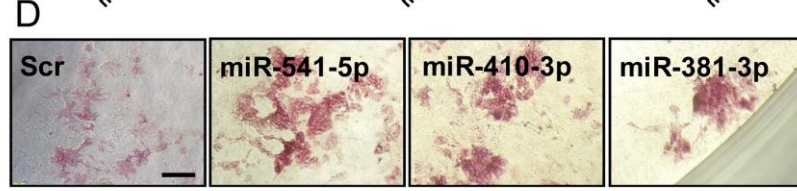

**Figure S4: Expression of miRNA genes relative to chromosomal location and functional analysis of ground state-associated miRNAs, related to Figures 4 and 5**

(A) Expression of miRNA genes relative to chromosomal location in (i) serum, (ii) 2i, and (iii) R2i cultures. Y-axis indicates the total read numbers of miRNAs expressed from different chromosomes. Small RNA sequencing data were obtained for two ESC lines (RB18 and EB20) each time using pools of three independently grown cultures.

(B) The majority of ground state up miRNAs are embedded in the *Dlk1-Dio3* locus. Ground state up miRNAs that are embedded in *Dlk1-Dio3* locus are shown in red font.

(C) qRT-PCR analysis indicating expression levels of miRNAs delivered into MEFs 1 day after transfection. snoRNA202 was used as an internal normalization control. Data are shown as mean  $\pm$  SD, n=3.

(D) AP staining of LIF-deprived ESCs treated with miRNA mimics 5 days after transfection. Scale bar: 50  $\mu$ m.

A

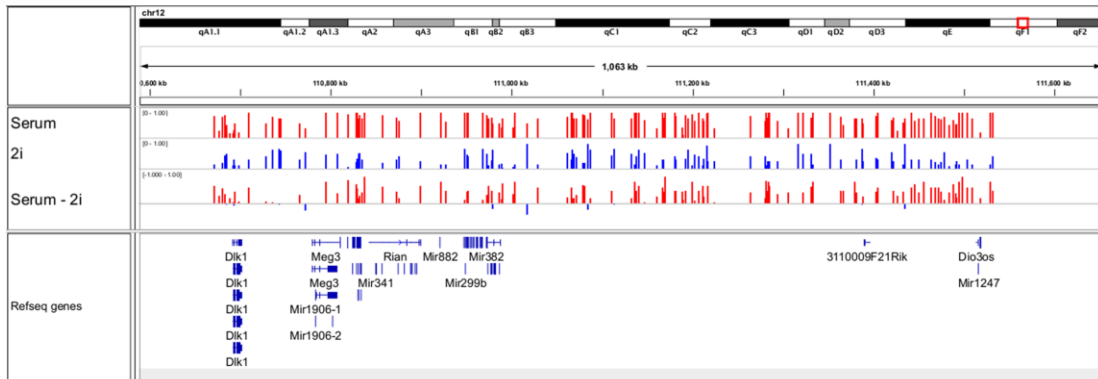

B

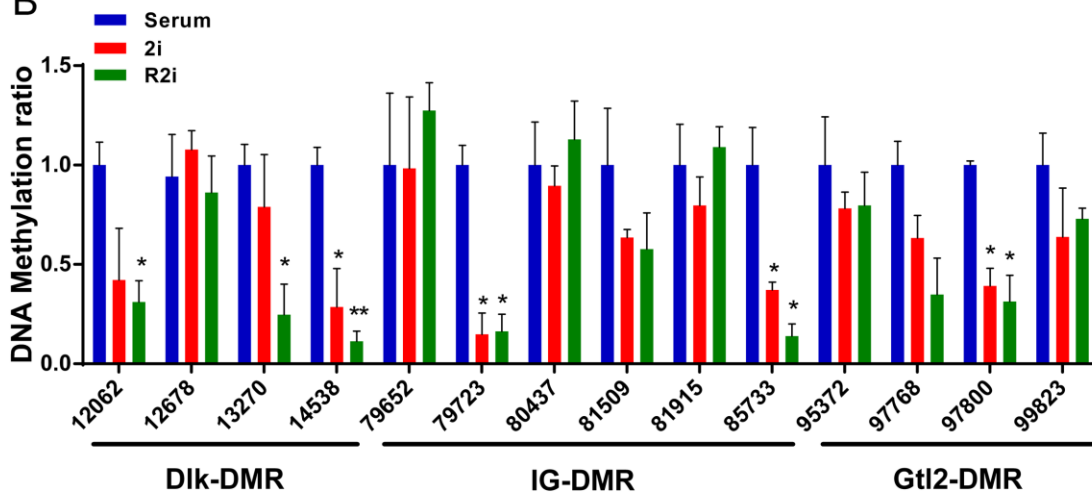

**Figure S5: DNA methylation analysis of the *Dlk1-Dio3* locus, related to Figure 4**

(A) IGV visualization of the methylation level of CpG dinucleotides at the *Dlk1-Dio3* locus for serum and 2i ESCs.

(B) Bar plots indicating the ratio of DNA methylation of the three DMRs at the *Dlk1-Dio3* locus in serum, 2i, and R2i cells as determined by qPCR. The X-axis numbers refer to the nucleotide positions in the *Dlk1-Dio3* locus corresponding to the site of enzymatic digestion. Data are shown as mean  $\pm$  SD, n=3. \*p<0.05.

A

| miRNA                 | miR-541-5p | miR-410-3p | miR-381-3p |
|-----------------------|------------|------------|------------|
| Putative gene targets | P4ha1      | Myl12b     | Map4       |
|                       | Prkag1     | Cbx3       | Rbm26      |
|                       | Acat1      | Pcbp2      | Idh2       |
|                       | Cpt1a      | Srsf11     | Srsf1      |
|                       | Myo1b      |            | Pura       |
|                       | Ero1l      |            |            |
|                       | Mrpl15     |            |            |
|                       | Sbno1      |            |            |
|                       | Cdv3       |            |            |
|                       | Map4       |            |            |

B

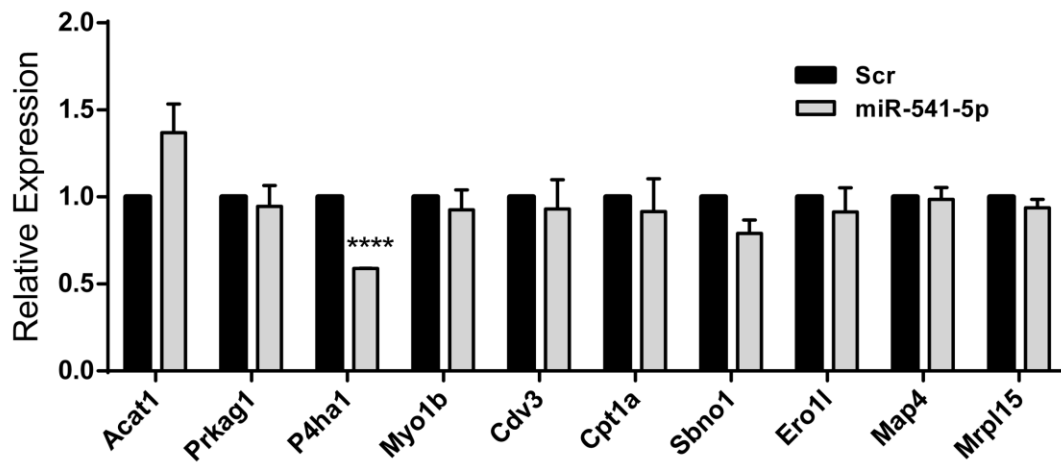

C

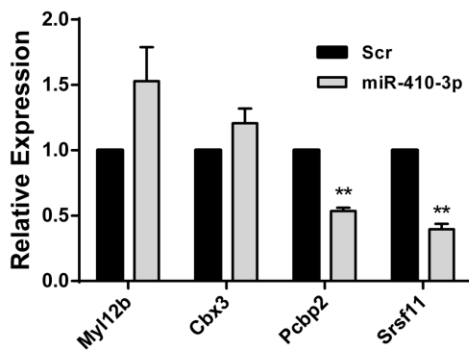

D

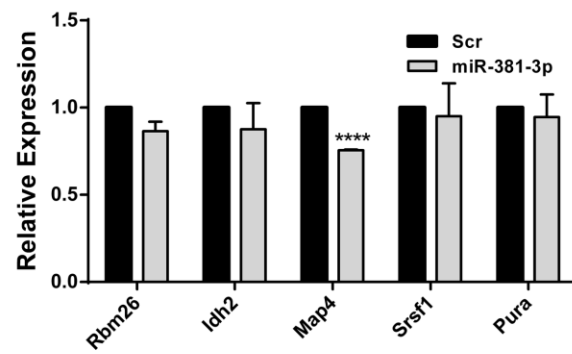

**Figure S6: Putative gene targets of miR-541-5p, miR-410-3p, and miR-381-3p, related to Figures 5, 6, and 7**

(A) List of genes that are both predicted to be targeted by the candidate miRNAs and downregulated at the protein level.

(B) Bar plot indicating expression of genes that are potentially regulated by miR-541-5p. Data are shown as mean  $\pm$  SD, n=3. \*\*\*\*p<0.0001

(C) Bar plot indicating the expression of genes that are potentially regulated by miR-410-5p. Data are shown as mean  $\pm$  SD, n=3. \*\*p<0.01

(D) Bar plot indicating the expression of genes that are potentially regulated by miR-381-5p. Data are shown as mean  $\pm$  SD, n=3. \*\*\*\*p<0.0001

**Table S1. List of 2i-associated miRNAs (versus serum), related to Figure 3**

| miRNA ID        | Log2 fold change | P value  | Adjusted P value |
|-----------------|------------------|----------|------------------|
| mmu-let-7g-5p   | 1.60052          | 8.23E-08 | 5.08E-07         |
| mmu-miR-1193-3p | 4.177641         | 2.62E-08 | 1.68E-07         |
| mmu-miR-1197-3p | 5.020111         | 5.88E-10 | 4.37E-09         |
| mmu-miR-127-3p  | 3.583421         | 3.93E-25 | 8.99E-24         |
| mmu-miR-127-5p  | 4.201075         | 1.31E-10 | 1.06E-09         |
| mmu-miR-134-5p  | 3.515577         | 3.96E-19 | 6.11E-18         |
| mmu-miR-136-3p  | 3.884938         | 3.00E-31 | 2.05E-29         |
| mmu-miR-136-5p  | 4.061845         | 4.40E-27 | 1.36E-25         |
| mmu-miR-147-3p  | 1.535454         | 8.18E-06 | 3.85E-05         |
| mmu-miR-147-5p  | 1.60728          | 2.46E-05 | 0.000105         |
| mmu-miR-154-3p  | 3.66622          | 5.04E-07 | 2.83E-06         |
| mmu-miR-154-5p  | 2.991621         | 0.000712 | 0.002363         |
| mmu-miR-15a-3p  | 1.537571         | 0.002305 | 0.006524         |
| mmu-miR-15a-5p  | 1.510485         | 6.02E-07 | 3.32E-06         |
| mmu-miR-184-3p  | 2.532587         | 1.07E-08 | 7.10E-08         |
| mmu-miR-199a-3p | 1.23427          | 0.001959 | 0.005858         |
| mmu-miR-218-5p  | 1.336842         | 0.00029  | 0.001045         |
| mmu-miR-299a-3p | 2.266181         | 2.80E-05 | 0.000119         |
| mmu-miR-299a-5p | 2.123809         | 0.002128 | 0.006253         |
| mmu-miR-300-3p  | 4.318177         | 9.93E-34 | 1.02E-31         |
| mmu-miR-301a-3p | 1.41271          | 1.50E-07 | 8.88E-07         |
| mmu-miR-301a-5p | 1.8322           | 1.42E-05 | 6.39E-05         |
| mmu-miR-301b-3p | 1.367345         | 3.86E-06 | 1.89E-05         |
| mmu-miR-301b-5p | 2.461023         | 0.000719 | 0.002374         |
| mmu-miR-302a-3p | 1.087048         | 0.00168  | 0.005107         |
| mmu-miR-302b-3p | 1.661023         | 2.77E-07 | 1.61E-06         |
| mmu-miR-302c-3p | 2.050203         | 4.35E-07 | 2.46E-06         |
| mmu-miR-3085-3p | 2.79865          | 5.87E-05 | 0.00024          |
| mmu-miR-323-3p  | 4.547108         | 1.65E-22 | 3.18E-21         |
| mmu-miR-324-5p  | 1.766364         | 8.94E-08 | 5.46E-07         |
| mmu-miR-329-3p  | 3.722546         | 9.44E-11 | 7.87E-10         |
| mmu-miR-329-5p  | 3.579605         | 4.23E-11 | 3.63E-10         |
| mmu-miR-337-3p  | 4.599271         | 1.73E-08 | 1.13E-07         |
| mmu-miR-337-5p  | 3.924626         | 3.28E-19 | 5.18E-18         |
| mmu-miR-341-3p  | 3.656685         | 6.23E-19 | 9.38E-18         |
| mmu-miR-341-5p  | 2.958018         | 0.001512 | 0.004689         |
| mmu-miR-367-3p  | 1.516567         | 0.000476 | 0.001631         |
| mmu-miR-369-3p  | 4.156381         | 3.05E-26 | 7.53E-25         |
| mmu-miR-369-5p  | 4.914904         | 1.02E-09 | 7.23E-09         |
| mmu-miR-370-3p  | 3.742272         | 1.99E-18 | 2.73E-17         |
| mmu-miR-370-5p  | 2.679494         | 0.00211  | 0.00623          |
| mmu-miR-376a-3p | 4.580739         | 1.14E-19 | 1.89E-18         |
| mmu-miR-376a-5p | 3.429957         | 1.52E-05 | 6.79E-05         |
| mmu-miR-376b-3p | 4.023984         | 2.28E-25 | 5.40E-24         |
| mmu-miR-376b-5p | 4.44467          | 5.64E-12 | 5.27E-11         |
| mmu-miR-376c-3p | 3.50518          | 1.27E-17 | 1.63E-16         |
| mmu-miR-377-3p  | 5.239542         | 2.05E-14 | 2.18E-13         |
| mmu-miR-379-3p  | 3.098211         | 2.40E-10 | 1.90E-09         |
| mmu-miR-379-5p  | 3.211695         | 1.81E-18 | 2.56E-17         |
| mmu-miR-380-3p  | 4.617464         | 9.99E-38 | 2.05E-35         |
| mmu-miR-381-3p  | 3.087566         | 1.07E-15 | 1.22E-14         |
| mmu-miR-382-3p  | 3.47989          | 4.67E-08 | 2.97E-07         |
| mmu-miR-382-5p  | 4.122065         | 2.23E-14 | 2.34E-13         |
| mmu-miR-409-3p  | 3.982859         | 1.75E-30 | 1.08E-28         |
| mmu-miR-409-5p  | 3.59994          | 2.13E-11 | 1.97E-10         |
| mmu-miR-410-3p  | 3.94237          | 2.77E-28 | 1.01E-26         |

|                 |          |          |          |
|-----------------|----------|----------|----------|
| mmu-miR-411-3p  | 3.736336 | 2.36E-11 | 2.14E-10 |
| mmu-miR-411-5p  | 3.679751 | 1.41E-22 | 2.81E-21 |
| mmu-miR-412-3p  | 3.425334 | 0.003376 | 0.009342 |
| mmu-miR-412-5p  | 3.58605  | 8.97E-07 | 4.77E-06 |
| mmu-miR-431-3p  | 5.073442 | 3.44E-17 | 4.24E-16 |
| mmu-miR-431-5p  | 4.681326 | 2.70E-36 | 4.17E-34 |
| mmu-miR-433-3p  | 4.323864 | 7.97E-18 | 1.07E-16 |
| mmu-miR-434-3p  | 3.627581 | 2.45E-30 | 1.26E-28 |
| mmu-miR-434-5p  | 3.652803 | 2.44E-29 | 1.07E-27 |
| mmu-miR-451a    | 3.084706 | 0.000384 | 0.001347 |
| mmu-miR-485-3p  | 3.173984 | 1.42E-14 | 1.54E-13 |
| mmu-miR-485-5p  | 3.455305 | 5.24E-05 | 0.000218 |
| mmu-miR-487b-3p | 4.388037 | 8.64E-20 | 1.48E-18 |
| mmu-miR-493-3p  | 3.385705 | 0.00217  | 0.006342 |
| mmu-miR-494-3p  | 3.652028 | 2.64E-07 | 1.55E-06 |
| mmu-miR-495-3p  | 4.388145 | 1.71E-28 | 7.03E-27 |
| mmu-miR-496a-3p | 4.051567 | 3.33E-12 | 3.21E-11 |
| mmu-miR-499-5p  | 3.1575   | 5.88E-15 | 6.60E-14 |
| mmu-miR-505-3p  | 2.738654 | 0.000355 | 0.00126  |
| mmu-miR-539-5p  | 4.224067 | 7.66E-05 | 0.000305 |
| mmu-miR-540-3p  | 3.293543 | 4.12E-17 | 4.99E-16 |
| mmu-miR-540-5p  | 3.734214 | 5.37E-05 | 0.000222 |
| mmu-miR-541-5p  | 3.620427 | 3.74E-34 | 4.62E-32 |
| mmu-miR-543-3p  | 4.300728 | 2.78E-31 | 2.05E-29 |
| mmu-miR-665-3p  | 4.217966 | 2.00E-28 | 7.72E-27 |
| mmu-miR-666-3p  | 5.317512 | 2.55E-09 | 1.77E-08 |
| mmu-miR-666-5p  | 5.06793  | 1.72E-26 | 5.04E-25 |
| mmu-miR-667-3p  | 3.87041  | 1.19E-07 | 7.22E-07 |
| mmu-miR-668-3p  | 4.3836   | 7.17E-07 | 3.85E-06 |
| mmu-miR-673-3p  | 3.94442  | 3.60E-07 | 2.07E-06 |
| mmu-miR-673-5p  | 3.728312 | 1.53E-19 | 2.49E-18 |
| mmu-miR-679-5p  | 2.917934 | 5.74E-07 | 3.19E-06 |
| mmu-miR-743b-3p | 1.971061 | 0.000579 | 0.001942 |
| mmu-miR-758-3p  | 4.209685 | 2.20E-30 | 1.23E-28 |
| mmu-miR-871-3p  | 1.104186 | 0.002272 | 0.006461 |

**Table S2. List of serum-associated miRNAs (versus 2i), related to Figure 3**

| miRNA ID        | Log2 fold change | P value  | Adjusted P value |
|-----------------|------------------|----------|------------------|
| mmu-miR-10a-5p  | 3.87726          | 1.98E-31 | 1.74E-29         |
| mmu-miR-125a-5p | 1.57999          | 5.80E-05 | 0.000239         |
| mmu-miR-133a-3p | 5.43483          | 6.30E-10 | 4.63E-09         |
| mmu-miR-155-5p  | 1.60141          | 2.01E-06 | 1.01E-05         |
| mmu-miR-181c-3p | 1.39042          | 8.04E-05 | 0.000318         |
| mmu-miR-181d-5p | 1.24856          | 1.92E-05 | 8.36E-05         |
| mmu-miR-1a-3p   | 6.16233          | 9.40E-10 | 6.74E-09         |
| mmu-miR-200a-3p | 1.16794          | 1.17E-05 | 5.38E-05         |
| mmu-miR-200a-5p | 1.64397          | 0.0001   | 0.000388         |
| mmu-miR-200b-3p | 1.75556          | 3.51E-10 | 2.70E-09         |
| mmu-miR-203-3p  | 4.27738          | 2.95E-26 | 7.53E-25         |
| mmu-miR-208b-3p | 3.94806          | 2.92E-11 | 2.54E-10         |
| mmu-miR-21a-3p  | 2.23079          | 4.51E-12 | 4.28E-11         |
| mmu-miR-21a-5p  | 2.68639          | 1.95E-24 | 4.29E-23         |
| mmu-miR-22-3p   | 1.58509          | 4.32E-07 | 2.46E-06         |
| mmu-miR-23a-3p  | 1.46251          | 1.28E-05 | 5.81E-05         |
| mmu-miR-24-2-5p | 1.38923          | 0.000363 | 0.001279         |
| mmu-miR-27a-3p  | 1.4175           | 1.87E-06 | 9.56E-06         |
| mmu-miR-27a-5p  | 1.91032          | 0.000226 | 0.000829         |
| mmu-miR-28a-3p  | 1.95939          | 3.01E-09 | 2.06E-08         |
| mmu-miR-28a-5p  | 1.53412          | 5.09E-06 | 2.45E-05         |
| mmu-miR-297a-3p | 2.92385          | 9.40E-07 | 4.96E-06         |
| mmu-miR-297a-5p | 3.03081          | 6.31E-11 | 5.33E-10         |
| mmu-miR-297b-3p | 3.13206          | 6.90E-06 | 3.29E-05         |
| mmu-miR-297b-5p | 3.17505          | 1.62E-05 | 7.18E-05         |
| mmu-miR-297c-3p | 2.39433          | 0.000852 | 0.002752         |
| mmu-miR-335-3p  | 1.73001          | 3.21E-09 | 2.18E-08         |
| mmu-miR-34b-3p  | 2.73207          | 6.94E-06 | 3.29E-05         |
| mmu-miR-34c-5p  | 2.72307          | 8.57E-17 | 1.02E-15         |
| mmu-miR-362-3p  | 1.86082          | 6.34E-05 | 0.000258         |
| mmu-miR-374b-3p | 1.75378          | 0.000606 | 0.002022         |
| mmu-miR-374b-5p | 1.48947          | 1.95E-06 | 9.86E-06         |
| mmu-miR-421-3p  | 1.59994          | 9.82E-07 | 5.13E-06         |
| mmu-miR-466a-3p | 2.4662           | 1.21E-05 | 5.55E-05         |
| mmu-miR-466a-5p | 2.96415          | 3.32E-05 | 0.00014          |
| mmu-miR-466b-3p | 2.90333          | 8.45E-18 | 1.11E-16         |
| mmu-miR-466b-5p | 2.70187          | 1.34E-14 | 1.47E-13         |
| mmu-miR-466c-3p | 2.67511          | 2.46E-11 | 2.20E-10         |
| mmu-miR-466c-5p | 2.87989          | 2.30E-17 | 2.89E-16         |
| mmu-miR-466d-3p | 3.48829          | 1.73E-06 | 8.92E-06         |
| mmu-miR-466d-5p | 3.25446          | 4.67E-14 | 4.72E-13         |
| mmu-miR-466e-3p | 2.47321          | 1.04E-05 | 4.84E-05         |
| mmu-miR-466e-5p | 2.3323           | 0.000535 | 0.001805         |
| mmu-miR-466f    | 2.55241          | 0.000511 | 0.001744         |
| mmu-miR-466f-5p | 3.34727          | 1.71E-10 | 1.37E-09         |
| mmu-miR-466h-3p | 3.56794          | 0.000868 | 0.00279          |
| mmu-miR-466h-5p | 2.87567          | 2.23E-13 | 2.21E-12         |
| mmu-miR-466n-3p | 2.93058          | 3.55E-10 | 2.71E-09         |
| mmu-miR-466n-5p | 3.02528          | 2.61E-12 | 2.55E-11         |
| mmu-miR-466o-5p | 2.66791          | 4.64E-05 | 0.000195         |
| mmu-miR-466p-3p | 3.02355          | 6.31E-07 | 3.44E-06         |
| mmu-miR-466p-5p | 2.90491          | 0.000295 | 0.001058         |
| mmu-miR-467a-3p | 3.54528          | 1.81E-29 | 8.58E-28         |
| mmu-miR-467a-5p | 2.6155           | 9.87E-19 | 1.45E-17         |
| mmu-miR-467b-5p | 2.66652          | 2.09E-09 | 1.46E-08         |
| mmu-miR-467c-5p | 3.63232          | 4.89E-39 | 1.51E-36         |



|                   |         |          |          |
|-------------------|---------|----------|----------|
| mmu-miR-467d-3p   | 3.21852 | 5.72E-10 | 4.31E-09 |
| mmu-miR-467d-5p   | 2.98514 | 2.25E-20 | 3.97E-19 |
| mmu-miR-467e-3p   | 2.97482 | 6.90E-07 | 3.74E-06 |
| mmu-miR-467e-5p   | 3.16111 | 2.84E-26 | 7.53E-25 |
| mmu-miR-483-3p    | 4.62733 | 3.29E-10 | 2.57E-09 |
| mmu-miR-483-5p    | 4.67976 | 6.90E-05 | 0.000278 |
| mmu-miR-532-3p    | 1.45958 | 0.00263  | 0.007376 |
| mmu-miR-532-5p    | 1.50469 | 5.91E-08 | 3.72E-07 |
| mmu-miR-669a-3-3p | 3.02171 | 1.83E-05 | 8.02E-05 |
| mmu-miR-669a-3p   | 3.08277 | 1.80E-26 | 5.04E-25 |
| mmu-miR-669a-5p   | 2.64805 | 3.30E-22 | 6.17E-21 |
| mmu-miR-669b-5p   | 3.00143 | 1.83E-18 | 2.56E-17 |
| mmu-miR-669c-5p   | 3.32342 | 1.02E-27 | 3.32E-26 |
| mmu-miR-669d-5p   | 3.4231  | 3.75E-22 | 6.81E-21 |
| mmu-miR-669e-3p   | 2.58227 | 0.002179 | 0.006342 |
| mmu-miR-669e-5p   | 3.66885 | 2.05E-23 | 4.36E-22 |
| mmu-miR-669f-3p   | 2.20867 | 9.07E-05 | 0.000356 |
| mmu-miR-669f-5p   | 2.71234 | 2.67E-11 | 2.36E-10 |
| mmu-miR-669h-5p   | 3.24075 | 6.30E-09 | 4.23E-08 |
| mmu-miR-669l-3p   | 3.5162  | 0.000971 | 0.003088 |
| mmu-miR-669l-5p   | 3.57413 | 8.02E-28 | 2.75E-26 |
| mmu-miR-669m-5p   | 3.02974 | 3.38E-23 | 6.95E-22 |
| mmu-miR-669o-3p   | 3.07816 | 1.31E-10 | 1.06E-09 |
| mmu-miR-669o-5p   | 2.48472 | 4.53E-14 | 4.66E-13 |
| mmu-miR-669p-3p   | 2.5773  | 0.001892 | 0.005696 |
| mmu-miR-669p-5p   | 2.62983 | 5.78E-16 | 6.73E-15 |
| mmu-miR-674-3p    | 1.72256 | 1.16E-06 | 6.00E-06 |
| mmu-miR-674-5p    | 1.53656 | 0.000121 | 0.000459 |
| mmu-miR-675-3p    | 4.28965 | 0.000343 | 0.001222 |
| mmu-miR-6944-3p   | 3.30547 | 6.42E-10 | 4.66E-09 |
| mmu-miR-92a-2-5p  | 1.85015 | 4.20E-06 | 2.04E-05 |
| mmu-miR-99b-5p    | 1.04178 | 0.002262 | 0.00646  |

**Table S3. List of R2i-associated miRNAs (versus serum), related to Figure 3**

| miRNA ID        | Log2 Fold Change | P value  | Adjusted p value |
|-----------------|------------------|----------|------------------|
| mmu-let-7g-5p   | 1.026505         | 0.000639 | 0.002435         |
| mmu-miR-1193-3p | 3.682127         | 1.18E-06 | 6.81E-06         |
| mmu-miR-1197-3p | 4.557951         | 2.29E-08 | 1.63E-07         |
| mmu-miR-1247-3p | 2.023308         | 0.002368 | 0.008161         |
| mmu-miR-127-3p  | 3.660928         | 3.71E-26 | 2.00E-24         |
| mmu-miR-127-5p  | 4.250293         | 9.30E-11 | 9.25E-10         |
| mmu-miR-134-5p  | 4.09155          | 2.44E-25 | 1.08E-23         |
| mmu-miR-136-3p  | 3.962237         | 2.14E-32 | 4.39E-30         |
| mmu-miR-136-5p  | 3.563506         | 4.94E-21 | 1.53E-19         |
| mmu-miR-147-3p  | 1.469419         | 2.21E-05 | 0.000107         |
| mmu-miR-147-5p  | 1.87855          | 9.10E-07 | 5.35E-06         |
| mmu-miR-153-3p  | 2.129974         | 5.11E-06 | 2.72E-05         |
| mmu-miR-154-3p  | 3.47848          | 2.18E-06 | 1.22E-05         |
| mmu-miR-154-5p  | 3.404436         | 0.00012  | 0.000529         |
| mmu-miR-15a-5p  | 1.125982         | 0.000207 | 0.000882         |
| mmu-miR-184-3p  | 1.974559         | 1.02E-05 | 5.27E-05         |
| mmu-miR-187-3p  | 1.262837         | 0.00274  | 0.009379         |
| mmu-miR-218-5p  | 1.115704         | 0.002751 | 0.009379         |
| mmu-miR-299a-3p | 2.915455         | 6.74E-08 | 4.57E-07         |
| mmu-miR-299a-5p | 2.502315         | 0.000304 | 0.001259         |
| mmu-miR-300-3p  | 4.095046         | 2.00E-30 | 2.46E-28         |
| mmu-miR-300-5p  | 3.300759         | 0.000978 | 0.003553         |
| mmu-miR-301a-3p | 1.169306         | 1.39E-05 | 7.03E-05         |
| mmu-miR-301a-5p | 1.428146         | 0.000847 | 0.00315          |
| mmu-miR-301b-3p | 1.056701         | 0.000367 | 0.001499         |
| mmu-miR-302a-3p | 2.172296         | 3.26E-10 | 2.96E-09         |
| mmu-miR-302a-5p | 2.010583         | 2.38E-06 | 1.32E-05         |
| mmu-miR-302b-3p | 2.494541         | 1.17E-14 | 1.68E-13         |
| mmu-miR-302c-3p | 3.070571         | 3.19E-14 | 4.38E-13         |
| mmu-miR-302c-5p | 1.992109         | 6.53E-05 | 0.000301         |
| mmu-miR-302d-3p | 2.123171         | 1.07E-08 | 7.87E-08         |
| mmu-miR-302d-5p | 2.053181         | 6.84E-05 | 0.000313         |
| mmu-miR-3072-3p | 3.127403         | 0.00189  | 0.006625         |
| mmu-miR-323-3p  | 4.322572         | 2.48E-20 | 6.64E-19         |
| mmu-miR-324-5p  | 1.074954         | 0.001285 | 0.004584         |
| mmu-miR-329-3p  | 3.510127         | 1.31E-09 | 1.08E-08         |
| mmu-miR-329-5p  | 3.44769          | 2.83E-10 | 2.61E-09         |
| mmu-miR-337-3p  | 4.820792         | 3.72E-09 | 2.98E-08         |
| mmu-miR-337-5p  | 4.003505         | 8.28E-20 | 1.89E-18         |
| mmu-miR-341-3p  | 3.683565         | 3.93E-19 | 8.35E-18         |

|                 |          |          |          |
|-----------------|----------|----------|----------|
| mmu-miR-3535    | 1.127635 | 0.000149 | 0.000646 |
| mmu-miR-367-3p  | 2.672808 | 6.26E-10 | 5.37E-09 |
| mmu-miR-369-3p  | 3.991549 | 3.37E-24 | 1.09E-22 |
| mmu-miR-369-5p  | 4.880154 | 1.52E-09 | 1.23E-08 |
| mmu-miR-370-3p  | 3.634605 | 2.37E-17 | 4.29E-16 |
| mmu-miR-376a-3p | 4.364697 | 7.54E-18 | 1.41E-16 |
| mmu-miR-376a-5p | 2.857094 | 0.000374 | 0.001519 |
| mmu-miR-376b-3p | 3.611718 | 1.45E-20 | 4.26E-19 |
| mmu-miR-376b-5p | 4.130688 | 2.00E-10 | 1.93E-09 |
| mmu-miR-376c-3p | 3.589962 | 2.77E-18 | 5.51E-17 |
| mmu-miR-377-3p  | 4.845733 | 2.00E-12 | 2.29E-11 |
| mmu-miR-379-3p  | 3.257469 | 3.24E-11 | 3.27E-10 |
| mmu-miR-379-5p  | 3.872263 | 3.89E-26 | 2.00E-24 |
| mmu-miR-380-3p  | 4.230026 | 9.08E-32 | 1.40E-29 |
| mmu-miR-381-3p  | 3.516498 | 6.79E-20 | 1.66E-18 |
| mmu-miR-382-3p  | 3.336479 | 2.02E-07 | 1.31E-06 |
| mmu-miR-382-5p  | 4.237989 | 5.05E-15 | 7.98E-14 |
| mmu-miR-409-3p  | 3.950542 | 5.72E-30 | 5.88E-28 |
| mmu-miR-409-5p  | 3.403733 | 3.37E-10 | 3.01E-09 |
| mmu-miR-410-3p  | 3.716682 | 2.78E-25 | 1.14E-23 |
| mmu-miR-411-3p  | 3.801019 | 1.32E-11 | 1.40E-10 |
| mmu-miR-411-5p  | 3.831339 | 2.92E-24 | 1.06E-22 |
| mmu-miR-412-5p  | 2.884534 | 9.87E-05 | 0.000444 |
| mmu-miR-431-3p  | 4.841877 | 1.12E-15 | 1.82E-14 |
| mmu-miR-431-5p  | 4.202259 | 2.05E-29 | 1.58E-27 |
| mmu-miR-433-3p  | 3.853132 | 2.86E-14 | 4.01E-13 |
| mmu-miR-434-3p  | 3.584975 | 1.39E-29 | 1.23E-27 |
| mmu-miR-434-5p  | 3.880914 | 7.24E-33 | 2.23E-30 |
| mmu-miR-451a    | 3.925137 | 5.86E-06 | 3.09E-05 |
| mmu-miR-470-5p  | 1.584688 | 9.93E-05 | 0.000444 |
| mmu-miR-485-3p  | 3.212024 | 9.05E-15 | 1.36E-13 |
| mmu-miR-485-5p  | 3.642984 | 2.15E-05 | 0.000104 |
| mmu-miR-487b-3p | 4.08367  | 3.53E-17 | 5.88E-16 |
| mmu-miR-494-3p  | 4.175452 | 4.02E-09 | 3.18E-08 |
| mmu-miR-495-3p  | 4.045337 | 3.15E-24 | 1.08E-22 |
| mmu-miR-496a-3p | 3.940805 | 1.65E-11 | 1.73E-10 |
| mmu-miR-499-5p  | 2.932804 | 5.69E-13 | 6.75E-12 |
| mmu-miR-5121    | 1.247815 | 0.000174 | 0.000751 |
| mmu-miR-539-5p  | 4.292943 | 6.19E-05 | 0.000287 |
| mmu-miR-540-3p  | 3.529823 | 2.44E-19 | 5.37E-18 |
| mmu-miR-540-5p  | 3.211803 | 0.000588 | 0.002254 |
| mmu-miR-541-5p  | 3.900606 | 2.31E-39 | 1.43E-36 |

|                |          |          |          |
|----------------|----------|----------|----------|
| mmu-miR-543-3p | 4.055485 | 8.85E-28 | 6.07E-26 |
| mmu-miR-665-3p | 4.128172 | 3.84E-27 | 2.37E-25 |
| mmu-miR-666-3p | 4.152546 | 4.29E-06 | 2.32E-05 |
| mmu-miR-666-5p | 4.418284 | 2.93E-20 | 7.53E-19 |
| mmu-miR-667-3p | 3.599379 | 1.04E-06 | 6.08E-06 |
| mmu-miR-668-3p | 3.157516 | 0.000451 | 0.001795 |
| mmu-miR-673-3p | 4.02305  | 2.34E-07 | 1.49E-06 |
| mmu-miR-673-5p | 3.770622 | 7.01E-20 | 1.66E-18 |
| mmu-miR-677-5p | 1.303209 | 2.06E-05 | 0.000102 |
| mmu-miR-679-5p | 2.899979 | 8.11E-07 | 4.81E-06 |
| mmu-miR-758-3p | 3.85022  | 1.74E-25 | 8.26E-24 |
| mmu-miR-871-3p | 1.360755 | 0.000175 | 0.000751 |
| mmu-miR-874-3p | 2.629872 | 2.56E-07 | 1.61E-06 |

**Table S4. List of serum-associated miRNAs (versus R2i), related to Figure 3**

| miRNA ID          | Log2 Fold Change | P value  | Adjusted p value |
|-------------------|------------------|----------|------------------|
| mmu-let-7e-5p     | 1.52341          | 3.01E-05 | 0.000144         |
| mmu-miR-10a-5p    | 2.15682          | 2.14E-11 | 2.20E-10         |
| mmu-miR-125a-3p   | 1.65385          | 0.000949 | 0.003484         |
| mmu-miR-125a-5p   | 1.9674           | 5.77E-07 | 3.49E-06         |
| mmu-miR-125b-1-3p | 1.79227          | 0.000477 | 0.001888         |
| mmu-miR-133a-3p   | 3.97152          | 2.97E-07 | 1.85E-06         |
| mmu-miR-142a-3p   | 2.19719          | 7.19E-08 | 4.82E-07         |
| mmu-miR-142a-5p   | 2.43938          | 6.36E-12 | 7.01E-11         |
| mmu-miR-146a-5p   | 2.04349          | 1.76E-10 | 1.72E-09         |
| mmu-miR-152-5p    | 1.53467          | 0.000979 | 0.003553         |
| mmu-miR-155-5p    | 1.48648          | 1.25E-05 | 6.38E-05         |
| mmu-miR-181c-3p   | 2.60936          | 4.29E-13 | 5.29E-12         |
| mmu-miR-181c-5p   | 2.14744          | 6.17E-15 | 9.52E-14         |
| mmu-miR-181d-5p   | 2.4829           | 2.76E-17 | 4.87E-16         |
| mmu-miR-1a-3p     | 2.57797          | 0.000411 | 0.001645         |
| mmu-miR-200a-3p   | 1.05069          | 8.20E-05 | 0.000372         |
| mmu-miR-200a-5p   | 1.5657           | 0.00026  | 0.001086         |
| mmu-miR-200b-3p   | 1.40789          | 4.94E-07 | 3.05E-06         |
| mmu-miR-203-3p    | 3.46253          | 1.70E-18 | 3.51E-17         |
| mmu-miR-208b-3p   | 3.73695          | 6.26E-10 | 5.37E-09         |
| mmu-miR-21a-3p    | 2.51088          | 1.17E-14 | 1.68E-13         |
| mmu-miR-21a-5p    | 2.43637          | 2.25E-20 | 6.30E-19         |
| mmu-miR-22-3p     | 1.50959          | 1.49E-06 | 8.49E-06         |
| mmu-miR-23a-3p    | 1.94247          | 8.39E-09 | 6.31E-08         |
| mmu-miR-24-2-5p   | 2.21037          | 2.10E-08 | 1.51E-07         |
| mmu-miR-27a-3p    | 1.4747           | 7.51E-07 | 4.50E-06         |
| mmu-miR-27a-5p    | 2.53934          | 2.99E-06 | 1.63E-05         |
| mmu-miR-28a-3p    | 1.25755          | 0.000136 | 0.000596         |
| mmu-miR-28a-5p    | 1.23602          | 0.00025  | 0.00105          |
| mmu-miR-297a-3p   | 2.07167          | 0.0004   | 0.001613         |
| mmu-miR-297a-5p   | 2.12757          | 2.79E-06 | 1.54E-05         |
| mmu-miR-297b-3p   | 2.38195          | 0.000488 | 0.001916         |
| mmu-miR-297c-3p   | 2.26393          | 0.001958 | 0.006826         |
| mmu-miR-31-5p     | 1.68844          | 7.88E-08 | 5.23E-07         |
| mmu-miR-335-3p    | 1.1739           | 5.87E-05 | 0.000274         |
| mmu-miR-34c-5p    | 1.08604          | 0.000826 | 0.003087         |
| mmu-miR-362-3p    | 1.58077          | 0.000761 | 0.002879         |
| mmu-miR-374b-5p   | 1.2173           | 0.000106 | 0.000469         |
| mmu-miR-421-3p    | 1.34879          | 3.90E-05 | 0.000185         |
| mmu-miR-466a-3p   | 2.07749          | 0.000245 | 0.001034         |

|                 |         |          |          |
|-----------------|---------|----------|----------|
| mmu-miR-466b-3p | 2.10253 | 3.74E-10 | 3.29E-09 |
| mmu-miR-466b-5p | 2.12545 | 1.31E-09 | 1.08E-08 |
| mmu-miR-466c-3p | 1.78562 | 6.25E-06 | 3.27E-05 |
| mmu-miR-466c-5p | 2.14839 | 2.18E-10 | 2.07E-09 |
| mmu-miR-466d-3p | 2.1528  | 0.001796 | 0.006333 |
| mmu-miR-466d-5p | 2.43989 | 9.38E-09 | 6.98E-08 |
| mmu-miR-466e-3p | 1.69531 | 0.002196 | 0.00761  |
| mmu-miR-466f    | 2.60037 | 0.000581 | 0.00224  |
| mmu-miR-466f-5p | 2.15427 | 1.83E-05 | 9.08E-05 |
| mmu-miR-466h-5p | 2.13618 | 3.93E-08 | 2.72E-07 |
| mmu-miR-466n-3p | 2.053   | 7.97E-06 | 4.13E-05 |
| mmu-miR-466n-5p | 2.22737 | 1.79E-07 | 1.17E-06 |
| mmu-miR-466p-3p | 1.9775  | 0.000809 | 0.003044 |
| mmu-miR-466p-5p | 2.64913 | 0.001106 | 0.003992 |
| mmu-miR-467a-3p | 2.63471 | 3.16E-17 | 5.42E-16 |
| mmu-miR-467a-5p | 1.80709 | 9.20E-10 | 7.77E-09 |
| mmu-miR-467b-5p | 1.55055 | 0.000349 | 0.001435 |
| mmu-miR-467c-5p | 2.82503 | 2.37E-24 | 9.15E-23 |
| mmu-miR-467d-3p | 2.8617  | 4.48E-08 | 3.07E-07 |
| mmu-miR-467d-5p | 2.28022 | 1.24E-12 | 1.45E-11 |
| mmu-miR-467e-3p | 2.60333 | 1.58E-05 | 7.92E-05 |
| mmu-miR-467e-5p | 2.24406 | 3.47E-14 | 4.65E-13 |
| mmu-miR-483-3p  | 3.21729 | 1.57E-06 | 8.86E-06 |
| mmu-miR-532-5p  | 1.59101 | 1.19E-08 | 8.62E-08 |
| mmu-miR-669a-3p | 2.51499 | 3.64E-18 | 7.03E-17 |
| mmu-miR-669a-5p | 1.85917 | 9.65E-12 | 1.04E-10 |
| mmu-miR-669b-5p | 2.13996 | 2.67E-10 | 2.50E-09 |
| mmu-miR-669c-5p | 2.28157 | 4.73E-14 | 6.21E-13 |
| mmu-miR-669d-5p | 2.40782 | 4.06E-12 | 4.56E-11 |
| mmu-miR-669e-5p | 2.62906 | 2.32E-13 | 2.92E-12 |
| mmu-miR-669f-3p | 1.96794 | 0.000567 | 0.002206 |
| mmu-miR-669f-5p | 1.83346 | 4.83E-06 | 2.59E-05 |
| mmu-miR-669h-5p | 2.16641 | 5.79E-05 | 0.000273 |
| mmu-miR-669l-5p | 2.41132 | 5.44E-14 | 7.00E-13 |
| mmu-miR-669m-5p | 2.1922  | 5.20E-13 | 6.29E-12 |
| mmu-miR-669o-3p | 2.37317 | 5.37E-07 | 3.28E-06 |
| mmu-miR-669o-5p | 1.90913 | 6.70E-09 | 5.17E-08 |
| mmu-miR-669p-3p | 3.00953 | 0.000568 | 0.002206 |
| mmu-miR-669p-5p | 1.8738  | 6.99E-09 | 5.32E-08 |
| mmu-miR-674-3p  | 2.11798 | 5.96E-09 | 4.66E-08 |
| mmu-miR-674-5p  | 1.73585 | 2.09E-05 | 0.000102 |
| mmu-miR-6944-3p | 2.98412 | 3.18E-08 | 2.23E-07 |

|                |         |          |          |
|----------------|---------|----------|----------|
| mmu-miR-99b-3p | 1.5231  | 0.000867 | 0.003202 |
| mmu-miR-99b-5p | 1.77098 | 2.16E-07 | 1.39E-06 |

**Table S5. List of 2i- and R2i-associated miRNAs, related to Figure 3**

| miRNA ID                                 | Log2 Fold Change | P value  | Adjusted p value |
|------------------------------------------|------------------|----------|------------------|
| <b>2i-associated miRNAs (versus R2i)</b> |                  |          |                  |
| mmu-miR-142a-3p                          | 1.92114          | 2.45E-06 | 0.000134         |
| mmu-miR-142a-5p                          | 2.62459          | 1.41E-13 | 3.48E-11         |
| mmu-miR-146a-5p                          | 1.23012          | 0.000126 | 0.004782         |
| mmu-miR-152-3p                           | 1.86974          | 2.18E-08 | 2.68E-06         |
| mmu-miR-152-5p                           | 2.44772          | 8.70E-08 | 8.57E-06         |
| mmu-miR-181c-5p                          | 1.44296          | 1.60E-07 | 1.31E-05         |
| mmu-miR-181d-5p                          | 1.23435          | 2.67E-05 | 0.001187         |
| mmu-miR-211-3p                           | 4.5873           | 2.63E-10 | 4.32E-08         |
| mmu-miR-211-5p                           | 4.56645          | 2.23E-39 | 1.10E-36         |
| <b>R2i-associated miRNAs (versus 2i)</b> |                  |          |                  |
| mmu-miR-10a-5p                           | 1.720439         | 4.07E-07 | 2.87E-05         |
| mmu-miR-302a-5p                          | 1.776923         | 2.89E-05 | 0.001187         |
| mmu-miR-302d-3p                          | 1.412517         | 0.000141 | 0.00496          |
| mmu-miR-34c-5p                           | 1.637035         | 6.20E-07 | 3.82E-05         |
| mmu-miR-3535                             | 1.325008         | 8.27E-06 | 0.000408         |
| mmu-miR-6240                             | 1.335964         | 0.000265 | 0.00872          |

**Table S6. List of serum- and ground state-associated miRNAs, related to Figure 3**

| Ground state-associated miRNAs (versus serum) |                  |                  | Serum-associated miRNAs (versus ground state) |                  |                  |
|-----------------------------------------------|------------------|------------------|-----------------------------------------------|------------------|------------------|
| miRNA ID                                      | Log2 Fold Change | Adjusted p value | miRNA ID                                      | Log2 Fold Change | Adjusted p value |
| mmu-let-7g-5p                                 | 1.346466         | 0.000227         | mmu-miR-10a-5p                                | 2.71438          | 1.40E-05         |
| mmu-miR-1193-3p                               | 4.223692         | 1.53E-07         | mmu-miR-125a-3p                               | 1.45761          | 0.001066         |
| mmu-miR-1197-3p                               | 5.213232         | 2.83E-08         | mmu-miR-125a-5p                               | 1.76216          | 0.000277         |
| mmu-miR-1247-3p                               | 2.047209         | 0.001109         | mmu-miR-133a-3p                               | 4.77846          | 1.16E-09         |
| mmu-miR-127-3p                                | 3.641083         | 1.23E-22         | mmu-miR-149-5p                                | 1.0969           | 0.003174         |
| mmu-miR-127-5p                                | 4.411212         | 1.05E-10         | mmu-miR-155-5p                                | 1.55942          | 6.57E-08         |
| mmu-miR-134-5p                                | 3.863615         | 9.43E-18         | mmu-miR-181a-2-3p                             | 2.07394          | 0.006915         |
| mmu-miR-136-3p                                | 3.950312         | 8.35E-31         | mmu-miR-181c-3p                               | 1.87785          | 0.000973         |
| mmu-miR-136-5p                                | 3.868125         | 1.29E-20         | mmu-miR-181d-5p                               | 1.72886          | 0.001278         |
| mmu-miR-147-3p                                | 1.519911         | 7.51E-07         | mmu-miR-200a-3p                               | 1.11462          | 3.42E-06         |
| mmu-miR-147-5p                                | 1.769462         | 3.53E-07         | mmu-miR-200a-5p                               | 1.62601          | 4.12E-05         |
| mmu-miR-154-3p                                | 3.77435          | 1.04E-06         | mmu-miR-200b-3p                               | 1.57816          | 1.68E-07         |
| mmu-miR-154-5p                                | 3.540456         | 0.00019          | mmu-miR-203-3p                                | 3.85143          | 2.67E-20         |
| mmu-miR-15a-3p                                | 1.40228          | 0.003559         | mmu-miR-208b-3p                               | 3.93947          | 8.45E-13         |
| mmu-miR-15a-5p                                | 1.336776         | 9.95E-05         | mmu-miR-21a-3p                                | 2.37758          | 1.72E-12         |
| mmu-miR-16-1-3p                               | 1.007219         | 0.009531         | mmu-miR-21a-5p                                | 2.56769          | 2.36E-24         |
| mmu-miR-184-3p                                | 2.2992           | 3.49E-06         | mmu-miR-22-3p                                 | 1.55562          | 3.42E-06         |



|                 |          |          |                 |         |          |
|-----------------|----------|----------|-----------------|---------|----------|
| mmu-miR-187-3p  | 1.175675 | 0.00399  | mmu-miR-23a-3p  | 1.69033 | 2.39E-05 |
| mmu-miR-1981-5p | 1.555043 | 0.002766 | mmu-miR-24-2-5p | 1.74394 | 0.000958 |
| mmu-miR-199a-3p | 1.20635  | 0.003041 | mmu-miR-27a-3p  | 1.45499 | 8.59E-07 |
| mmu-miR-218-5p  | 1.246712 | 0.000324 | mmu-miR-27a-5p  | 2.20878 | 3.72E-05 |
| mmu-miR-299a-3p | 2.684175 | 1.88E-06 | mmu-miR-28a-3p  | 1.57158 | 0.000144 |
| mmu-miR-299a-5p | 2.447515 | 0.000307 | mmu-miR-28a-5p  | 1.38864 | 6.54E-05 |
| mmu-miR-300-3p  | 4.242033 | 1.42E-28 | mmu-miR-297a-3p | 2.51336 | 1.56E-05 |
| mmu-miR-300-5p  | 3.341582 | 0.004116 | mmu-miR-297a-5p | 2.55356 | 9.07E-08 |
| mmu-miR-301a-3p | 1.302725 | 1.28E-06 | mmu-miR-297b-3p | 2.84516 | 2.98E-06 |
| mmu-miR-301a-5p | 1.672406 | 5.31E-05 | mmu-miR-297b-5p | 2.5682  | 0.000793 |
| mmu-miR-301b-3p | 1.227613 | 0.000166 | mmu-miR-297c-3p | 2.45532 | 5.69E-05 |
| mmu-miR-301b-5p | 2.362827 | 0.001111 | mmu-miR-335-3p  | 1.42225 | 0.000136 |
| mmu-miR-302a-3p | 1.729754 | 0.001358 | mmu-miR-34b-3p  | 1.99459 | 0.003108 |
| mmu-miR-302b-3p | 2.140033 | 2.14E-06 | mmu-miR-362-3p  | 1.75341 | 1.11E-05 |
| mmu-miR-302c-3p | 2.657353 | 1.20E-06 | mmu-miR-374b-3p | 1.68092 | 0.000199 |
| mmu-miR-3072-3p | 3.133091 | 0.00741  | mmu-miR-374b-5p | 1.35723 | 1.36E-05 |
| mmu-miR-323-3p  | 4.52449  | 9.71E-22 | mmu-miR-421-3p  | 1.47989 | 1.38E-05 |
| mmu-miR-324-3p  | 1.247244 | 0.004731 | mmu-miR-466a-3p | 2.33663 | 9.17E-07 |
| mmu-miR-324-5p  | 1.466346 | 0.000442 | mmu-miR-466a-5p | 2.52089 | 0.000161 |
| mmu-miR-329-3p  | 3.736309 | 2.27E-10 | mmu-miR-466b-3p | 2.45995 | 4.45E-09 |
| mmu-miR-329-5p  | 3.622638 | 2.37E-12 | mmu-miR-466b-5p | 2.4044  | 6.79E-11 |
| mmu-miR-337-3p  | 5.131488 | 3.60E-08 | mmu-miR-466c-3p | 2.18635 | 2.73E-06 |
| mmu-miR-337-5p  | 4.033849 | 2.20E-22 | mmu-miR-466c-5p | 2.47573 | 2.17E-09 |
| mmu-miR-341-3p  | 3.708818 | 1.16E-16 | mmu-miR-466d-3p | 2.78809 | 0.000102 |
| mmu-miR-341-5p  | 2.819602 | 0.008834 | mmu-miR-466d-5p | 2.83411 | 1.43E-10 |
| mmu-miR-367-3p  | 2.21524  | 0.000268 | mmu-miR-466e-3p | 2.09689 | 8.33E-05 |
| mmu-miR-369-3p  | 4.125175 | 2.00E-24 | mmu-miR-466e-5p | 2.25502 | 0.000118 |
| mmu-miR-369-5p  | 5.316992 | 6.83E-09 | mmu-miR-466f    | 2.71802 | 2.78E-05 |
| mmu-miR-370-3p  | 3.742474 | 2.76E-17 | mmu-miR-466f-5p | 2.67411 | 2.41E-06 |
| mmu-miR-370-5p  | 2.668108 | 0.004692 | mmu-miR-466h-3p | 3.69355 | 0.001068 |
| mmu-miR-376a-3p | 4.589456 | 6.72E-20 | mmu-miR-466h-5p | 2.48919 | 1.83E-09 |
| mmu-miR-376a-5p | 3.399585 | 6.99E-05 | mmu-miR-466k    | 2.34043 | 0.006553 |
| mmu-miR-376b-3p | 3.872204 | 2.61E-21 | mmu-miR-466n-3p | 2.46922 | 9.11E-07 |
| mmu-miR-376b-5p | 4.48077  | 5.51E-11 | mmu-miR-466n-5p | 2.61288 | 5.01E-09 |
| mmu-miR-376c-3p | 3.603797 | 3.68E-22 | mmu-miR-466o-5p | 2.18533 | 0.000515 |
| mmu-miR-377-3p  | 5.328743 | 1.56E-12 | mmu-miR-466p-3p | 2.46707 | 0.00017  |
| mmu-miR-379-3p  | 3.244779 | 4.25E-11 | mmu-miR-466p-5p | 2.95751 | 5.31E-05 |
| mmu-miR-379-5p  | 3.591239 | 4.87E-16 | mmu-miR-467a-3p | 3.01199 | 2.93E-12 |
| mmu-miR-380-3p  | 4.474326 | 2.03E-30 | mmu-miR-467a-5p | 2.15512 | 1.34E-07 |
| mmu-miR-381-3p  | 3.32822  | 1.86E-13 | mmu-miR-467b-5p | 2.02111 | 0.000164 |
| mmu-miR-382-3p  | 3.570635 | 6.42E-09 | mmu-miR-467c-5p | 3.16445 | 4.75E-16 |
| mmu-miR-382-5p  | 4.298436 | 1.94E-15 | mmu-miR-467d-3p | 3.10989 | 1.27E-12 |

|                 |          |          |                   |         |          |
|-----------------|----------|----------|-------------------|---------|----------|
| mmu-miR-409-3p  | 3.995605 | 2.48E-28 | mmu-miR-467d-5p   | 2.60192 | 6.64E-12 |
| mmu-miR-409-5p  | 3.609228 | 2.63E-12 | mmu-miR-467e-3p   | 2.88294 | 8.68E-09 |
| mmu-miR-410-3p  | 3.858489 | 4.31E-23 | mmu-miR-467e-5p   | 2.62303 | 6.26E-10 |
| mmu-miR-411-3p  | 3.893429 | 3.42E-13 | mmu-miR-483-3p    | 3.90738 | 1.10E-08 |
| mmu-miR-411-5p  | 3.796325 | 3.71E-23 | mmu-miR-483-5p    | 4.2486  | 0.000928 |
| mmu-miR-412-3p  | 4.300049 | 0.006055 | mmu-miR-532-3p    | 1.44713 | 0.000942 |
| mmu-miR-412-5p  | 3.474198 | 7.43E-06 | mmu-miR-532-5p    | 1.55719 | 6.79E-11 |
| mmu-miR-431-3p  | 5.14734  | 5.45E-16 | mmu-miR-669a-3-3p | 2.50769 | 0.000227 |
| mmu-miR-431-5p  | 4.49795  | 8.73E-27 | mmu-miR-669a-3p   | 2.77868 | 7.00E-17 |
| mmu-miR-433-3p  | 4.197099 | 2.10E-15 | mmu-miR-669a-5p   | 2.19413 | 2.08E-08 |
| mmu-miR-433-5p  | 2.95281  | 0.005417 | mmu-miR-669b-5p   | 2.51493 | 2.68E-09 |
| mmu-miR-434-3p  | 3.633688 | 5.23E-33 | mmu-miR-669c-5p   | 2.69534 | 6.17E-09 |
| mmu-miR-434-5p  | 3.794216 | 1.52E-29 | mmu-miR-669d-5p   | 2.82857 | 9.73E-10 |
| mmu-miR-451a    | 3.866863 | 9.67E-05 | mmu-miR-669e-3p   | 2.74839 | 0.000415 |
| mmu-miR-470-5p  | 1.359331 | 0.002239 | mmu-miR-669e-5p   | 3.06581 | 3.55E-11 |
| mmu-miR-485-3p  | 3.243292 | 7.72E-18 | mmu-miR-669f-3p   | 2.15046 | 6.76E-06 |
| mmu-miR-485-5p  | 3.886438 | 2.57E-05 | mmu-miR-669f-5p   | 2.23105 | 9.94E-07 |
| mmu-miR-487b-3p | 4.331313 | 2.22E-18 | mmu-miR-669h-5p   | 2.67599 | 1.34E-06 |
| mmu-miR-494-3p  | 4.105908 | 1.56E-07 | mmu-miR-669l-3p   | 2.9387  | 0.006154 |
| mmu-miR-495-3p  | 4.282929 | 1.75E-27 | mmu-miR-669l-5p   | 2.86718 | 3.80E-09 |
| mmu-miR-496a-3p | 4.141768 | 3.78E-13 | mmu-miR-669m-5p   | 2.55116 | 3.50E-10 |
| mmu-miR-499-5p  | 3.08594  | 2.12E-14 | mmu-miR-669o-3p   | 2.73991 | 1.46E-09 |
| mmu-miR-505-3p  | 2.56491  | 0.001681 | mmu-miR-669o-5p   | 2.18384 | 1.93E-09 |
| mmu-miR-539-5p  | 5.241534 | 0.000221 | mmu-miR-669p-3p   | 2.96495 | 7.74E-05 |
| mmu-miR-540-3p  | 3.459006 | 1.18E-19 | mmu-miR-669p-5p   | 2.21086 | 4.34E-08 |
| mmu-miR-540-5p  | 3.925899 | 0.000189 | mmu-miR-674-3p    | 1.9181  | 1.13E-08 |
| mmu-miR-541-3p  | 4.375227 | 0.004831 | mmu-miR-674-5p    | 1.64858 | 8.56E-06 |
| mmu-miR-541-5p  | 3.784097 | 1.12E-33 | mmu-miR-675-3p    | 4.11139 | 0.001253 |
| mmu-miR-543-3p  | 4.233375 | 5.23E-33 | mmu-miR-6944-3p   | 3.22073 | 2.08E-11 |
| mmu-miR-665-3p  | 4.229401 | 8.98E-32 | mmu-miR-92a-3p    | 1.14356 | 0.004217 |
| mmu-miR-666-3p  | 5.330333 | 2.14E-06 | mmu-miR-99b-3p    | 1.37392 | 0.001109 |
| mmu-miR-666-5p  | 4.860263 | 1.56E-20 | mmu-miR-99b-5p    | 1.35383 | 0.004856 |
| mmu-miR-667-3p  | 3.98145  | 1.53E-07 |                   |         |          |
| mmu-miR-668-3p  | 4.234536 | 7.74E-05 |                   |         |          |
| mmu-miR-673-3p  | 4.259766 | 3.26E-07 |                   |         |          |
| mmu-miR-673-5p  | 3.790264 | 5.95E-17 |                   |         |          |
| mmu-miR-679-5p  | 3.014489 | 2.14E-08 |                   |         |          |
| mmu-miR-743b-3p | 1.798647 | 0.001278 |                   |         |          |
| mmu-miR-758-3p  | 4.080903 | 5.22E-27 |                   |         |          |
| mmu-miR-871-3p  | 1.247032 | 0.00108  |                   |         |          |
| mmu-miR-874-3p  | 2.032867 | 0.006821 |                   |         |          |
| mmu-miR-98-5p   | 1.050864 | 0.005209 |                   |         |          |

**Table S7: List of predicted mRNA targets used for gene ontology and pathway analysis, related to Figures 3 and 5**

**Table S8. Potential biological pathways inhibited by miR-541-5p, miR-410-3p, and miR-381-3p (DAVID analysis), related to Figure 5**

| <b>miR-541-5p targets</b>                 |                |
|-------------------------------------------|----------------|
| <b>GO term</b>                            | <b>P value</b> |
| Chordate embryonic development            | 1.2E-3         |
| Muscle tissue development                 | 9.9E-2         |
| Transcription regulation                  | 3.9E-3         |
| Embryonic limb morphogenesis              | 5.5E-2         |
| Nucleotide-binding                        | 1.5E-2         |
| Adult locomotor behavior                  | 2.4E-2         |
| Chromatin binding                         | 2.9E-3         |
| Pattern specification process             | 9.9E-2         |
| <b>miR-410-3p targets</b>                 |                |
| Transcription regulation                  | 1.7E-22        |
| Vasculature development                   | 7.8E-9         |
| Respiratory system development            | 9.6E-9         |
| Neuron differentiation                    | 6.8E-9         |
| Cell migration                            | 1.0E-6         |
| Wnt signaling pathway                     | 6.5E-7         |
| Sensory organ development                 | 2.3E-7         |
| Chordate embryonic development            | 2.0E-5         |
| <b>miR-381-3p targets</b>                 |                |
| Transcription regulation                  | 4.9E-26        |
| Pattern specification process             | 1.1E-8         |
| Cell morphogenesis during differentiation | 6.1E-10        |
| Neuron differentiation                    | 1.6E-7         |
| Embryonic morphogenesis                   | 2.7E-7         |
| Nucleoplasm                               | 1.6E-9         |
| Sensory organ development                 | 5.2E-8         |
| Wnt signaling pathway                     | 1.7E-5         |

## II. Supplemental Experimental Procedures

### Cell culture

RB18 and RB20 mouse ESC lines were maintained at 37°C in 5% CO<sub>2</sub>, cultivated on gelatinized tissue-culture plates and dishes (Sigma-Aldrich), and passaged every other day. Serum ESCs were cultured in Knockout™ DMEM (Invitrogen) supplemented with 15% ES-qualified fetal bovine serum (HyClone), 0.1 mM β-mercaptoethanol (Sigma-Aldrich), 0.1 mM non-essential amino acids (Invitrogen), 2 mM L-glutamine (Invitrogen), 100 U/ml penicillin, 100 μg/ml streptomycin (Invitrogen), and 1000 U/ml mouse LIF (mLIF, Royan Biotech). 2i and R2i cells were cultured in N2B27 media that consisted of Neurobasal® medium and DMEM/F-12 (both from Invitrogen) at a 1:1 ratio, 1% N2 supplement (Invitrogen), 1% B27 supplement (Invitrogen), 0.1 mM β-mercaptoethanol, 5 mg/ml BSA (Invitrogen), 2 mM L-glutamine, 0.1 mM non-essential amino acids, 100 U/ml penicillin, 100 μg/ml streptomycin, and 1000 U/ml mLIF. Small-molecule chemicals used in 2i and R2i cultures were added at the following concentrations: 1 μM PD0325901 (Stemgent), 10 μM SB431542 (Sigma-Aldrich), and 3 μM CHIR99021 (Stemgent).

For spontaneous differentiation through embryoid body (EB) formation, the ESCs were trypsinized and suspended in serum ESC medium without LIF on non-adherent bacterial petri dishes at  $1.5 \times 10^5$  cells/ml. Five days after induction of EB formation, a fraction of the EBs was transferred onto gelatinized 24-well plates for alkaline phosphatase (AP) staining on day 7. Remaining EBs were allowed to differentiate in suspension and harvested on day 7 for qRT-PCR analysis of pluripotency- and differentiation-associated genes. Media were changed every other day.

### **Small RNA delivery**

RB20 ESCs were seeded 24 h prior to transfection on gelatinized plates in ESC medium, then transfected with 100 nM of miRNA mimics (Dharmacon, miRIDIAN microRNA mimics, Thermo Fisher Scientific) or 50 nM of miRNA Power Inhibitors (Exiqon) according to the manufacturer's instructions. Prior to transfection, the miRNA mimics or the scrambled small RNA control were diluted in serum-free DMEM/F-12 (Invitrogen) and incubated with the diluted DharmaFECT1 transfection reagent (Dharmacon, Thermo Fisher Scientific) in serum-free DMEM/F-12 for 20 min at RT. miRNA inhibitors were directly added to the cell culture media without any reagent, as recommended by the manufacturer. After miRNA/anti-miRNA delivery, cells were incubated at 37°C in a humidified incubator containing 5% CO<sub>2</sub> prior to analysis. Cell-based and molecular assays were performed in triplicate (three biological replicates). Data are shown as the mean ± SD.

### **Cell viability assays**

#### ***MTS proliferation assay***

20 µl of the cell proliferation (MTS) reagent was directly added to the wells (96-well plate) according to the vendor's instructions (Promega) after removal of medium. Cells were incubated in a humidified incubator at 37°C for 1-3 h. Cell viability was measured by determining absorbance at 495 nm on a Multiskan MCC microplate reader (Thermo Fisher Scientific).

#### ***Live/dead viability assay***

A working solution containing 0.1 µM calcein acetoxymethyl ester (calcein AM) and 0.1 µM ethidium homodimer-1 in PBS was prepared according to the instructions in the Live/Dead<sup>®</sup>

Viability/Cytotoxicity Kit for Mammalian Cells (Molecular Probes). Cells were incubated with the reagent in a humidified incubator at RT for 30-60 min. After removal of the reagent, cells were washed with PBS and viewed under fluorescence microscope (Olympus, IX71).

### **RNA isolation and qRT-PCR**

Total RNA was extracted using either the miRVana™ miRNA Isolation Kit (Invitrogen) or miRNeasy Micro Kit (Qiagen) according to the manufacturer's instructions. NanoDrop was used to determine RNA concentration and purity. cDNA was generated from 1 µg of total RNA by reverse transcription with oligo-d T primers (Invitrogen Superscript Kit) in a 20 µl reaction. For quantitative real-time RT-PCR, the cDNA was diluted 1:10, and a total of 5 µl cDNA was used in a 25 µl PCR reaction with gene-specific primers (2.5 µM) and the Power SYBR® Green PCR Master Mix (Life Technologies). mRNA relative expression was normalized against *Gapdh* mRNA using the  $\Delta\Delta C_t$  method. Primer sequences are listed in the following table.

For miRNA qRT-PCR, total RNA was reverse-transcribed using specific TaqMan miRNA RT primers and amplified using miRNA-specific TaqMan® assays (Applied Biosystems). The amount of miRNA was normalized to snoRNA202. Data analysis was performed using the  $\Delta\Delta C_t$  method. Reactions were run on a StepOnePlus™ machine (Applied Biosystems) with three biological replicates for each of the qRT-PCR experiments.

**Primers used for mRNA quantification using qRT-PCR.**

| <b>Primer</b>          | <b>Primer sequence: (5' to 3')</b> |
|------------------------|------------------------------------|
| <i>Oct4-F</i>          | GAAGCCGACAACAATGAGAAC              |
| <i>Oct4-R</i>          | ATCCTTCTCTAGCCCAAGCTG              |
| <i>Sox2-F</i>          | AGAACCCCAAGATGCACAAC               |
| <i>Sox2-R</i>          | CTCCGGGAAGCGTGTACTTA               |
| <i>Esrrb-F</i>         | GGCGTTCTTCAAGAGAACCA               |
| <i>Esrrb-R</i>         | CCCACCTTTGAGGCATTTTCAT             |
| <i>Nanog-F</i>         | CTGATTCTTCTACCAGTCCCA              |
| <i>Nanog-R</i>         | AAACCAGGTCTTAACCTGCTTAT            |
| <i>Klf5-F</i>          | CCGGAGACGATCTGAAACAC               |
| <i>Klf5-R</i>          | CAGATACTTCTCCATTTACATCTTG          |
| <i>Gata4-F</i>         | GGTCCCAGGCCTCTTGCAATGCGG           |
| <i>Gata4-R</i>         | AGTGGCATTGCTGGAGTTACCGCTG          |
| <i>T (Brachyury)-F</i> | CGAGATGATTGTGACCAAGAAC             |
| <i>T (Brachyury)-R</i> | GGCCTGACACATTTACCTTCA              |
| <i>αMHC-F</i>          | TGGTCACCAACAACCCATACGACT           |
| <i>αMHC-R</i>          | TGTCAGCTTGTAGACACCAGCCTT           |
| <i>Pax6-F</i>          | TGAATGGGCGGAGTTATGAT               |
| <i>Pax6-R</i>          | GGACGGGAAGTACTGACTC                |
| <i>Nestin-F</i>        | CACACCTCAAGATGTCCC                 |
| <i>Nestin-R</i>        | GAAAGCCAAGAGAAGCCT                 |
| <i>Map2-F</i>          | CTAAAGAACATCCGTCACAG               |
| <i>Map2-R</i>          | CTTCACATTACCACCTCCA                |
| <i>Tubb3-F</i>         | GCCTCCTCTCACAAGTATG                |
| <i>Tubb3-R</i>         | CCTCCGTATAGTGCCCTT                 |
| <i>FoxA2-F</i>         | GCAGACACTTCCTACTACCAA              |
| <i>FoxA2-R</i>         | CTCCACTCAGCCTCTCATT                |
| <i>Sox7-F</i>          | AAGGATGAGAGGAAACGTCTG              |
| <i>Sox7-R</i>          | ATCCACATAGGGTCTCTTCTG              |
| <i>Sox17-F</i>         | GATGTAAAGGTGAAAGGCCGA              |
| <i>Sox17-R</i>         | AAGACTTGCTAGCATCTTG                |
| <i>Gapdh-F</i>         | GACTTCAACAGCAACTCCCAC              |
| <i>Gapdh-R</i>         | TCCACCACCCTGTTGCTGTA               |
| <i>Nkx2.5-F</i>        | CCTCGGGCGGATAAAAAAGAGC             |
| <i>Nkx2.5-R</i>        | TAGCGACGGTTCTGGAACCA               |
| <i>CK18-F</i>          | ATTTTCAGTCTCAACGATGCC              |
| <i>CK18-R</i>          | GAACTCTGGTGTGATTAGTCTC             |
| <i>Rex1-F</i>          | TAGCCGCCTAGATTTCCACT               |
| <i>Rex1-R</i>          | GTCCATTCTCTAATGCCAC                |
| <i>Fgf5-F</i>          | CAAGTGCCAAATTTACGGATGA             |



|                 |                           |
|-----------------|---------------------------|
| <i>Fgf5-R</i>   | GAACAGTGACGGTGAAGGAA      |
| <i>Map4-F</i>   | GGAGTGGCTTTCTTCCCAAGCTG   |
| <i>Map4-R</i>   | GGCCCTAAGATCAACATCAAGGAGG |
| <i>Rbm26-F</i>  | GATGCAGGCTGGAGAAGAAGTCAC  |
| <i>Rbm26-R</i>  | CCGTGAGCTGTACCTCGACCTC    |
| <i>Idh2-F</i>   | CCGCCATTACCGAGAACACCAG    |
| <i>Idh2-R</i>   | AGTGCTCGTTCAGCTTCACATTGC  |
| <i>Srsf1-F</i>  | ACCCATACTGACAGTTGATACCAC  |
| <i>Srsf1-R</i>  | CTGGGAGGAAGAGAGGAACATTGC  |
| <i>Pura-F</i>   | GGCACCTCCTTGACTGTGGAC     |
| <i>Pura-R</i>   | AGAAGGTGTGTCCGAACTTGG     |
| <i>Myl12b-F</i> | GAAGCCACAGGCACCATCCAG     |
| <i>Myl12b-R</i> | GCCTCTCTGTACAGCTCATCCAC   |
| <i>Cbx3-F</i>   | AGATGCTGCTGACAAACCAAGG    |
| <i>Cbx3-R</i>   | AAGGCAATGACAATCTGAGGACAC  |
| <i>Pcbp2-F</i>  | TCGGCAGGTTACCATCACTGGATC  |
| <i>Pcbp2-R</i>  | TGGATGGGTCTGCTCTGTTCTAGC  |
| <i>Srsf11-F</i> | GCCTGCAGAATCGTCACCAGTACC  |
| <i>Srsf11-R</i> | GCCACCCAACACTAGCCATCTACC  |
| <i>P4ha1-F</i>  | TGAGCGATGTGTCTGCTGGAG     |
| <i>P4ha1-R</i>  | CACGGCCTTCGAAATTCTTGTC    |
| <i>Prkag1-F</i> | CCGAGTCTCCGCCTTACCTGTAG   |
| <i>Prkag1-R</i> | CCACCAGACGGTGAACCTCTGC    |
| <i>Acat1-F</i>  | CACGGAGGAGCTGTTTCTCTGG    |
| <i>Acat1-R</i>  | CAGCCGGTCACATGGAAGTGC     |
| <i>Cpt1a-F</i>  | AGCCATGGAGGTTGTCCACGAG    |
| <i>Cpt1a-R</i>  | GTCCATCATGGCTTGTCTCAAGTG  |
| <i>Myo1b-F</i>  | CCGAGGTCCCCCTGGTAGATG     |
| <i>Myo1b-R</i>  | GAGAGTCGTGCGATACAGCTTGG   |
| <i>Ero11-F</i>  | AGCGGACCAAGTTATGAGTTCCAG  |
| <i>Ero11-R</i>  | GCACATTCCAACCGTCCTCCTCAG  |
| <i>Mrpl15-F</i> | GAGGGCAGACTCCATTTTACATACG |
| <i>Mrpl15-R</i> | GGCAGCAATGGCTAATTCTGAAGC  |
| <i>Sbno1-F</i>  | CCTCTAGCATCTTCAGTCAGTCAG  |
| <i>Sbno1-R</i>  | CCAGGCTATGAGCTACTGTCTACC  |
| <i>Cdv3-F</i>   | CCTGTCAGTTACCTACCTTGTCAC  |
| <i>Cdv3-R</i>   | CTCCACCTCCTGCTTCTACTACTG  |

## Cell cycle analysis

ESCs (initially seeded at  $2.0 \times 10^5$  cells/well in 6-well plates) were trypsinized and harvested on day 3 post-transfection, then washed once at RT in 1X PBS. While vortexing, ice-cold 70% ethanol was added to the cells drop by drop in order to fix the cells. Next, the cells were incubated at  $-20^\circ\text{C}$  for at least 2 h, then washed twice with ice-cold PBS in order to remove the ethanol. For propidium iodide (PI)/RNase staining, the cells were resuspended in PI/RNase Staining Buffer (100  $\mu\text{g}/\text{ml}$  RNase and 12.5  $\mu\text{g}/\text{ml}$  PI) and incubated at RT (or  $37^\circ\text{C}$ ) for 15-30 min in the dark. Flow cytometry was performed using a BD LSR II flow cytometer (BD Biosciences) and the data were analyzed with BD FACSDiva (BD Biosciences). The experiments were performed in triplicate.

#### **Alkaline phosphatase (AP) staining and colony formation assay**

AP staining was performed using a Leukocyte Alkaline Phosphatase Kit (Sigma-Aldrich) according to the vendor's instructions. Briefly, cells were washed with PBS, fixed with 4% paraformaldehyde, washed with deionized water, stained for 15 min at RT in the dark, washed again with PBS, and then suspended in PBS for storage.

miRNA mimics were transfected into ESCs 24 h after plating ( $6.0 \times 10^4$  cells/well of 12-well plates) and 3 days later the cells were trypsinized and replated at  $5.0 \times 10^3$  cells/well on gelatin-coated 24-well plates. AP activity was determined 5 days after replating. Differentiated (AP-negative) and undifferentiated (AP-positive) colonies were counted to determine clonogenicity.

#### **Analysis of DNA methylation**

To analyze the high-throughput methylation data of serum and 2i cells, the pre-processed whole-genome bisulfite sequencing data of the mESCs cultured in 2i and serum conditions were

obtained from GSE56879 (Angermueller et al., 2016). From all CpGs, we kept only those with minimum sequencing coverage of 5 reads in both 2i and serum conditions. Methylation ratio of each condition and the difference between conditions were computed using custom R script. The results were visualized using IGV version 2.3.67 (Robinson et al., 2011).

To analyze DNA methylation using methylation-sensitive restriction enzyme digestion followed by qPCR (MSRE-qPCR), the methylation level of a selected set of CpG dinucleotides within the three DMRs of the *Dlk1-Dio3* locus was determined by restriction enzyme digestion and real-time PCR analysis using specific primers designed to amplify genomic regions flanking specific restriction sites within the *Dlk1-Dio3* locus. Two methylation-sensitive enzymes HhaI and HpaII (NEB, UK) were used to digest the DNA. Preparation of DNA templates, enzymatic digestion and real-time PCR analysis were performed according to Oakes and colleagues (Oakes et al., 2006). Briefly, DNA was extracted from 2i, R2i and serum cells using DNeasy Blood & Tissue Kit (Qiagen, USA). 2µg DNA (50 ng/µl) was digested by HhaI or HpaII. A mock digestion with no enzyme (sham) was performed for each sample. In order to perform qPCR, the *Dlk1-Dio3* region (GeneBank ID: AJ320506.1) was used as template and specific primer pairs were designed to amplify the flanking fragments of either HhaI or HpaII restriction sites (see Table below). A control primer pair (F: GGTGCCAGCAGAGACTTACACAG and R: CATGCCCTTTGACACTTAGTATGC) was designed for *β2m* gene to amplify a region that is devoid of the restriction sites of HpaII and HhaI. Real-time PCR was performed using a StepOnePlus instrument (Thermofisher, USA) in a final reaction volume of 20 µl with 12.5 ng of digested template, 10 µl SYBR green master mix 2X and 200 nM of each forward and reverse primers. The thermal reaction condition was as follows: an initial denaturation at 95 °C for 10

min, followed by 40 cycles of denaturation at 95 °C for 10 s, annealing at 60 °C for 20 s and extension at 72 °C for 20 s. All reactions were run in triplicate.

**Primers used for DNA methylation analysis.**

| <b>DMR</b> | <b>CpG Position in DMR (AJ320506.1)</b> | <b>Primer pair</b>                                                        | <b>Enzyme</b> |
|------------|-----------------------------------------|---------------------------------------------------------------------------|---------------|
|            | 12062                                   | F: 5'-AGCTGCAATGCTCATTCCCTAGTG-3'<br>R: 5'-TAGTGGTCTATTCACCCAAGTGC-3'     | HpaII         |
|            | 12678                                   | F: 5'-GGAAAGGGCATGGGAGAGGAC-3'<br>R: 5'-CCATCGTTCTCGCATGGGTTAGG-3'        | HhaI          |
|            | 13270                                   | F: 5'-AGGCCATCTGCTTCACCATCC-3'<br>R: 5'-CGCTGTTATACTGCAACAGGAG-3'         | HhaI          |
|            | 14538                                   | F: 5'-GCCCAAGACTCCACCTCATGC-3'<br>R: 5'-CACCCCACAAGCCATAGTGTC-3'          | HpaII         |
|            | 79652                                   | F: 5'- GGATCCTGACCTATGTGTACCTCTG-3'<br>R: 5'- ACGGACCGTGTGTATGTGCTGTAG-3' | HhaI          |
|            | 79723                                   | F: 5'- GGATCCTGACCTATGTGTACCTCTG-3'<br>R: 5'- ACGGACCGTGTGTATGTGCTGTAG-3' | HpaII         |
|            | 80437                                   | F: 5'-TCTTGTGGCAAAGGTACGTGACTG-3'<br>R: 5'-GTATGCTATGCATTTGTGCTGAAGG-3'   | HpaII         |
|            | 81915                                   | F: 5'-AGCTGACTTCCTTCAGCCACAGT-3'<br>R: 5'-TTGACCCTGTGAGAGATGCTCAG-3'      | HpaII         |
|            | 81915                                   | F: 5'-AGCTGACTTCCTTCAGCCACAGT-3'<br>R: 5'-TTGACCCTGTGAGAGATGCTCAG-3'      | HpaII         |
|            | 85733                                   | F: 5'- AGTTTCTGGGAAACGTACAGAAGG-3'<br>R: 5'- CACTTCTCTGCAAGGCCAAGTC-3'    | HhaI          |
|            | 95372                                   | F: 5'-GGTCGGGAGCGAGATGGGTTG-3'<br>R: 5'-GCGTCCATGACACCCTAAATCAC-3'        | HhaI          |
|            | 97768                                   | F: 5'-TCCCGTTCATGGCTCATGTGTCTC-3'<br>F: 5'-GCCCTGGAAATGACCGCACACTC-3'     | HhaI          |
|            | 97800                                   | F: 5'-TCCCGTTCATGGCTCATGTGTCTC-3'<br>F: 5'-GCCCTGGAAATGACCGCACACTC-3'     | HpaII         |
|            | 99823                                   | F: 5'-CCCTCTCAGTTTCCCAAACCTG-3'<br>R: 5'-CCAAGGTATCCTGGAAGAGCTGAC-3'      | HpaII         |

**Small RNA deep sequencing**

Total RNA was extracted from the mESC samples and used to generate small RNA libraries from which cDNA libraries were prepared at LC Sciences. The purified cDNA libraries were

then used for cluster generation on Illumina's Cluster Station and then sequenced on Illumina GAIIx (Illumina HiSeq 1000/Illumina GAIIx) according to the vendor's instruction for running the instrument. Raw sequencing reads (up to 45 nt) were obtained using Illumina's Sequencing Control Studio software version 2.8 following real-time sequencing image analysis and base-calling by Illumina's Real-Time Analysis version 1.8.70 (LC Sciences).

### **Bioinformatics and statistical analyses**

In order to determine the expression levels of miRNAs across the samples, we used miARma-Seq pipeline for raw data analysis. Briefly, the pre-processed sequences were subjected to quality assessment using FastQC v0.11.5. The minimum observed Phred score across all samples and all bases was 30 (Sanger/Illumina 1.9 encoding), which depicted the high quality of sequencing procedure. Cutadapt v1.3 (Creighton et al., 2008) was used to trim the adapter sequences (TruSeq small RNA 3' adapter TGGAATTCTCGGGTGCCAAGG and small RNA sequencing 5' primer TTCAGAGTTCTACAGTCCGACGATC according to Illumina Adapter Sequences manual v01, Feb 2016) and remove the processed sequences shorter than 15 or longer than 35 bases. A second quality control was performed after the adapter trimming using FastQC. We then used bowtie v1.1.2 (Langmead et al., 2009) to align the processed reads against *Mus musculus* genome assembly mm10 (GRCm38) obtained from the UCSC Genome Bioinformatics. The location of the miRNAs and other small non-coding RNAs was processed from the miRBase genome coordinates mmu.gff3 v21. The number of reads that were mapped to the genomic location of each mature miRNA was counted using the featureCounts v1.5.0-p1 (Liao et al., 2014).

Cross-sample normalization and differential expression analysis were performed based on a Negative Binomial distribution analysis by R/Bioconductor package DESeq2 (Love et al., 2014). The miRNAs with the absolute log<sub>2</sub>-fold change greater than 1 and the adjusted *p*-values less than 0.01 (Bonferroni-Hochberg) were considered significantly differentially expressed. Principal Components Analysis (PCA), pairwise Pearson correlation coefficients heatmaps, and visualization of the results was performed by a custom R script using several packages such as ggplot2, pheatmap, plyr, reshape2, and gplots. Target prediction analysis was performed by miRGate database (Andres-Leon et al., 2015). The predicted targets that were reported in the TargetScan database (Lewis et al., 2005) were considered for further analysis. The gene ontology (GO) analysis was done by the DAVID gene annotation tool v6.8 (Huang da et al., 2009) and Enrichr (Kuleshov et al., 2016). We also used GraphPad Prism v5.0 to visualize some of the results.

For all assays, n represents the number of independent experiments.

### III. Supplemental References

- Andres-Leon, E., Gonzalez Pena, D., Gomez-Lopez, G., and Pisano, D.G. (2015). miRGate: a curated database of human, mouse and rat miRNA-mRNA targets. Database (Oxford) bav035.
- Angermueller, C., Clark, S.J., Lee, H.J., Macaulay, I.C., Teng, M.J., Hu, T.X., Krueger, F., Smallwood, S.A., Ponting, C.P., Voet, T., *et al.* (2016). Parallel single-cell sequencing links transcriptional and epigenetic heterogeneity. *Nat. Methods* *13*, 229-232.
- Creighton, C.J., Nagaraja, A.K., Hanash, S.M., Matzuk, M.M., and Gunaratne, P.H. (2008). A bioinformatics tool for linking gene expression profiling results with public databases of microRNA target predictions. *RNA* *14*, 2290-2296.
- Huang da, W., Sherman, B.T., and Lempicki, R.A. (2009). Systematic and integrative analysis of large gene lists using DAVID bioinformatics resources. *Nat. Protocols* *4*, 44-57.
- Kuleshov, M.V., Jones, M.R., Rouillard, A.D., Fernandez, N.F., Duan, Q., Wang, Z., Koplev, S., Jenkins, S.L., Jagodnik, K.M., Lachmann, A., *et al.* (2016). Enrichr: a comprehensive gene set enrichment analysis web server 2016 update. *Nucleic Acids Res.* *44*, W90-97.
- Langmead, B., Trapnell, C., Pop, M., and Salzberg, S.L. (2009). Ultrafast and memory-efficient alignment of short DNA sequences to the human genome. *Genome Biol.* *10*, R25.
- Lewis, B.P., Burge, C.B., and Bartel, D.P. (2005). Conserved seed pairing, often flanked by adenosines, indicates that thousands of human genes are microRNA targets. *Cell* *120*, 15-20.
- Liao, Y., Smyth, G.K., and Shi, W. (2014). featureCounts: an efficient general purpose program for assigning sequence reads to genomic features. *Bioinformatics* *30*, 923-930.
- Love, M.I., Huber, W., and Anders, S. (2014). Moderated estimation of fold change and dispersion for RNA-seq data with DESeq2. *Genome Biol.* *15*, 550.
- Oakes, C.C., La Salle, S., Robaire, B., and Trasler, J.M. (2006). Evaluation of a quantitative DNA methylation analysis technique using methylation-sensitive/dependent restriction enzymes and real-time PCR. *Epigenetics* *1*, 146-152.
- Robinson, J.T., Thorvaldsdottir, H., Winckler, W., Guttman, M., Lander, E.S., Getz, G., and Mesirov, J.P. (2011). Integrative genomics viewer. *Nat. Biotechnol.* *29*, 24-26.
